# Supplementary material for: An enantioselective organocatalyzed aza-Morita–Baylis–Hillman reaction of isatin-derived ketimines with acrolein
Source: Royal Society of Chemistry journal article supplement (doi:10.1039/c5ob00874c), 2015-01-01
Supplement: c5ob00874c1.pdf [file c5ob00874c1.pdf]

## Supporting Information

### **An enantioselective organocatalyzed aza-Morita–Baylis –Hillman reaction of isatin-derived ketimines with acrolein**

Yasushi Yoshida,<sup>a</sup> Makoto Sako,<sup>a</sup> Kenta Kishi,<sup>a</sup> Hiroaki Sasai,<sup>a</sup> Susumi Hatakeyama<sup>b</sup> and  
Shinobu Takizawa\*<sup>a</sup>

<sup>a</sup>The Institute of Scientific and Industrial Research (ISIR), Osaka University, Mihogaoka, Ibaraki-shi, Osaka 567-0047, Japan

<sup>b</sup>Graduate School of Biomedical Sciences, Nagasaki University, Bunkyo-machi, Nagasaki 852-8521, Japan

## Contents

|                            |               |
|----------------------------|---------------|
| <b>General information</b> | --- p2        |
| <b>NMR spectra</b>         | --- p2 - p16  |
| <b>HPLC chromatograms</b>  | --- p17 – p31 |
| <b>References</b>          | --- p32       |

## General information

$^1\text{H}$ -,  $^{13}\text{C}$ -, and  $^{19}\text{F}$ -NMR spectra were recorded with JEOL JMN ECS400 FT NMR, JNM ECA600 FT NMR or Bruker AVANCE II ( $^1\text{H}$ -NMR 400, 600 or 700 MHz,  $^{13}\text{C}$ -NMR 100, 150 or 175 MHz,  $^{19}\text{F}$ -NMR 376 MHz).  $^1\text{H}$ -NMR spectra are reported as follows: chemical shift in ppm relative to the chemical shift of  $\text{CHCl}_3$  at 7.26 ppm, integration, multiplicities (s = singlet, d = doublet, t = triplet, q = quartet, m = multiplet), and coupling constants (Hz).  $^{13}\text{C}$ -NMR spectra reported in ppm relative to the central line of triplet for  $\text{CDCl}_3$  at 77 ppm.  $\text{CF}_3\text{CO}_2\text{H}$  used as external standards for  $^{19}\text{F}$ -NMR. FT-MS spectra were obtained with LTQ Orbitrap XL (Thermo Fisher Scientific). ESI-MS spectra were obtained with JMS-T100LC (JEOL). FAB-MS spectra were obtained with JMS-700 (JEOL). Optical rotations were measured with JASCO P-1030 polarimeter. HPLC analyses were performed on a JASCO HPLC system (JASCO PU 980 pump and UV-975 UV/Vis detector) using a mixture of hexane and 2-propanol as eluents. FT-IR spectra were recorded on a JASCO FT-IR system (FT/IR4100). Column chromatography on  $\text{SiO}_2$  was performed with Kanto Silica Gel 60 (40-100  $\mu\text{m}$ ). Commercially available organic and inorganic compounds were used without further purification. *N*-*tert*-butoxycarbonyl (Boc) protected ketimines **1** were prepared following the reported procedures.<sup>1</sup> The product **3i** was identical in all respects with reported in the literature.<sup>2</sup>

## $^1\text{H}$ and $^{13}\text{C}$ -NMR spectra of **3a**

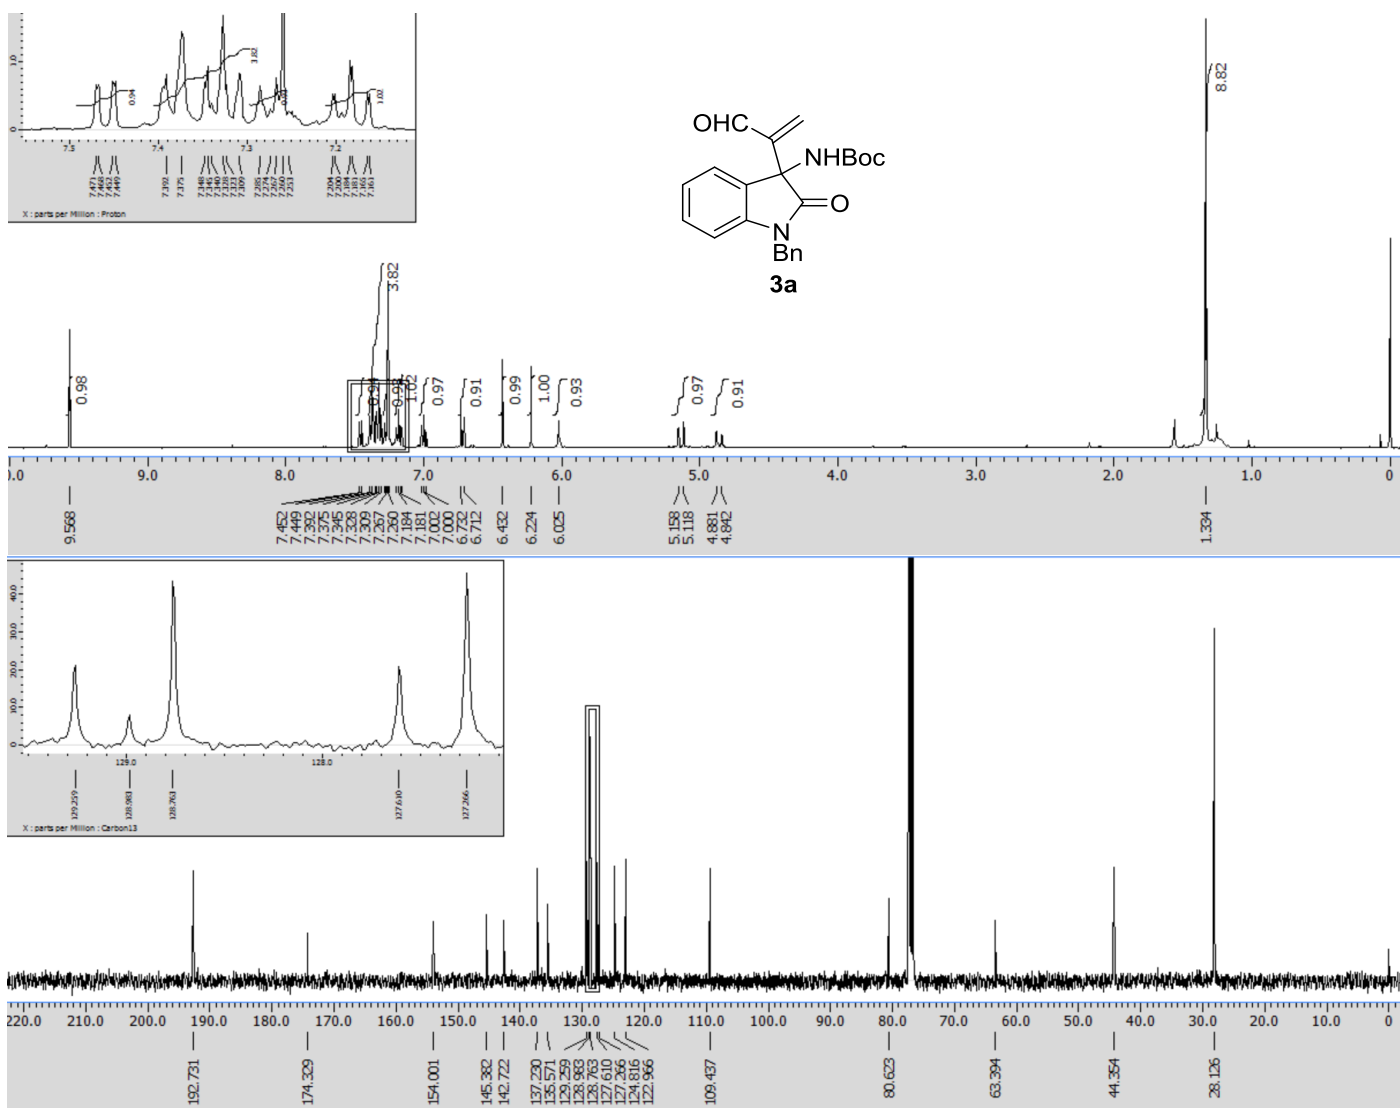

$^1\text{H}$  and  $^{13}\text{C}$ -NMR spectra of **3b**

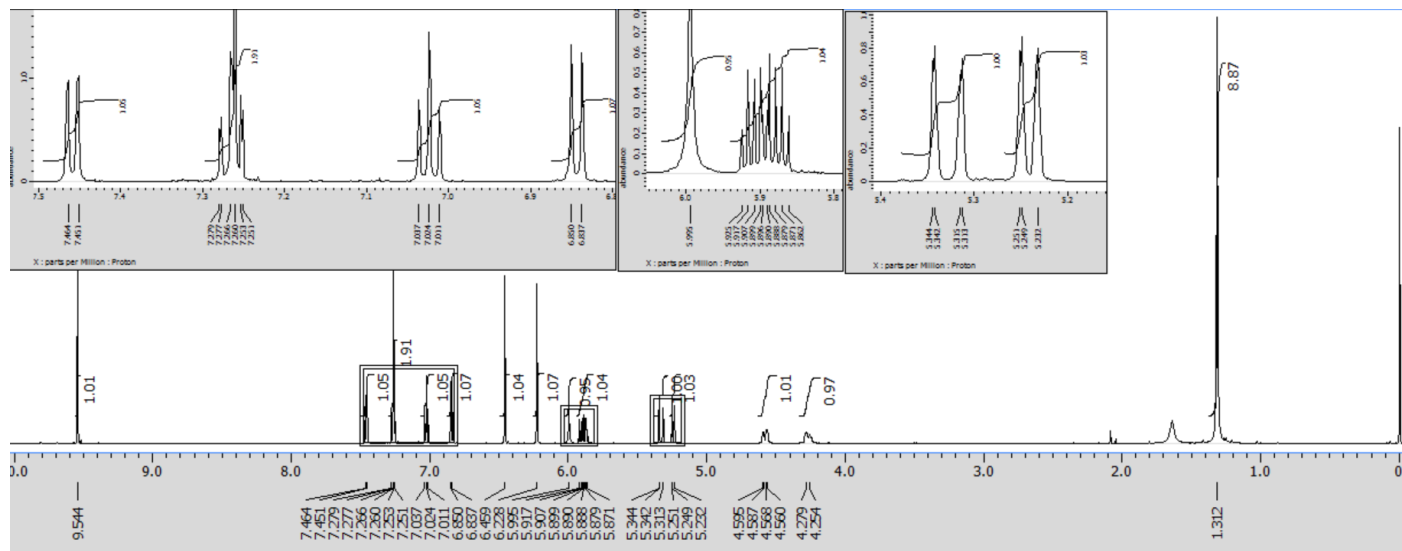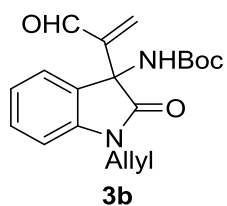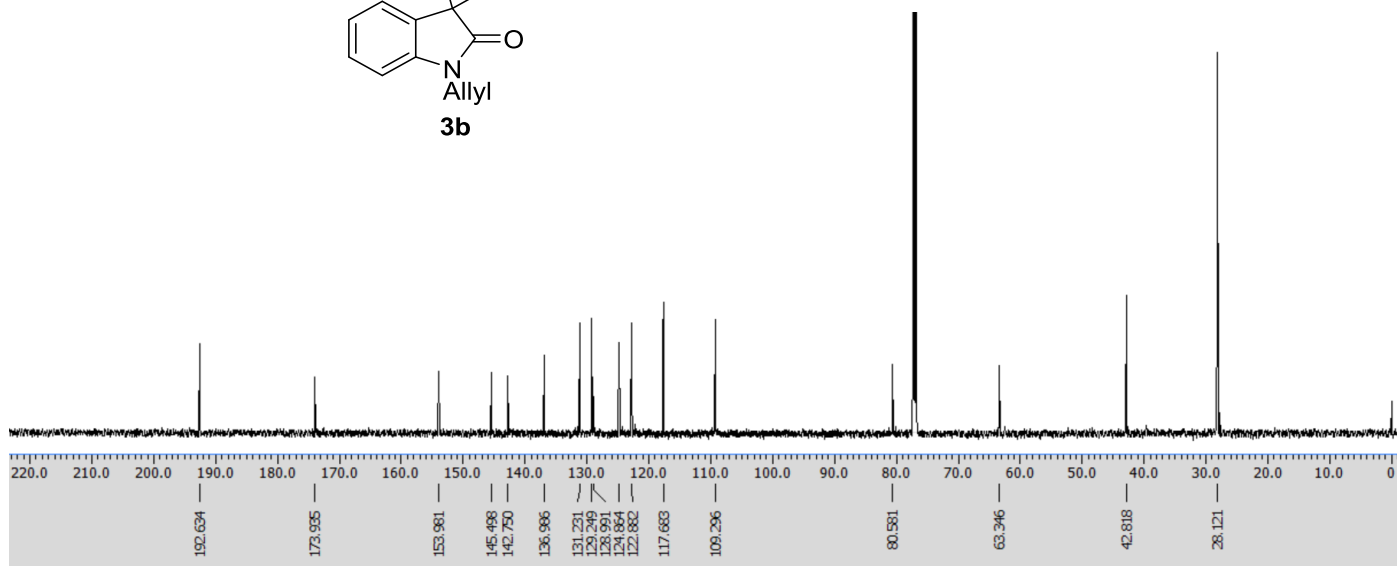

<sup>1</sup>H and <sup>13</sup>C-NMR spectra of 3c

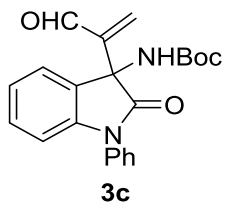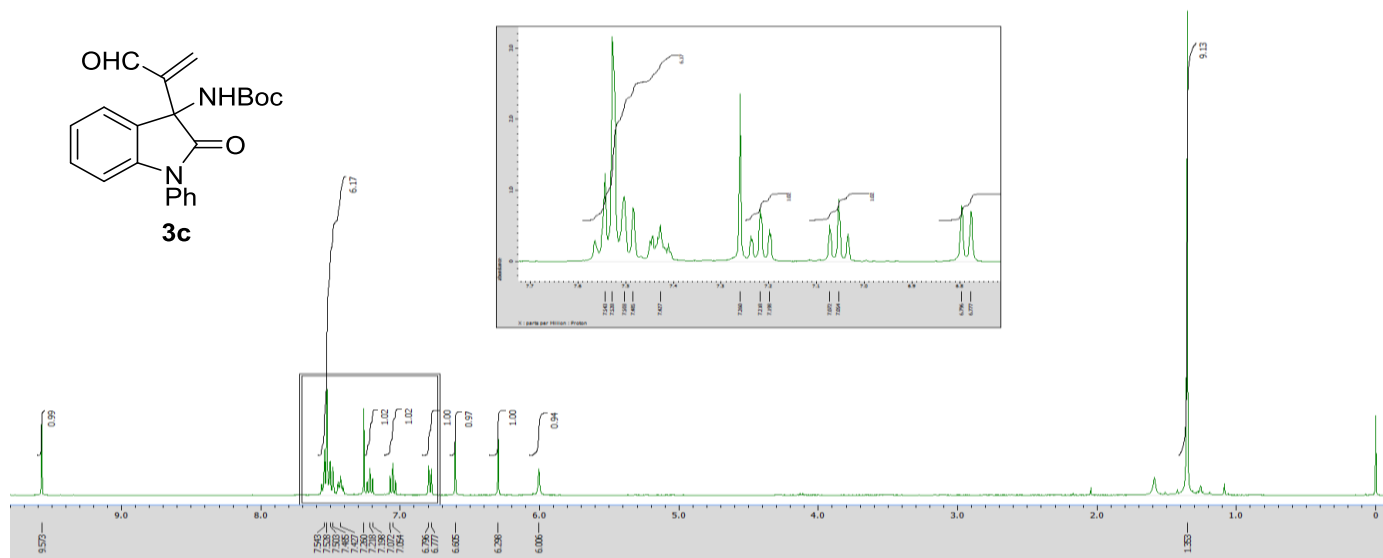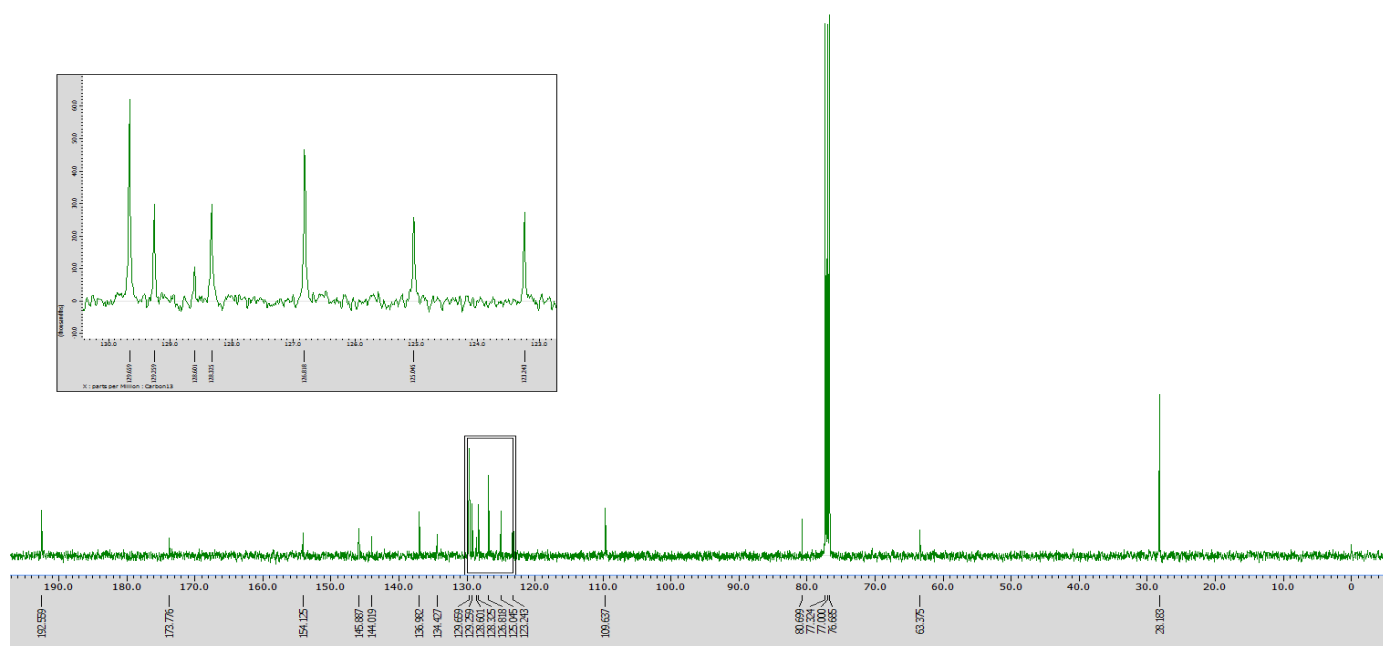

$^1\text{H}$  and  $^{13}\text{C}$ -NMR spectra of **3d**

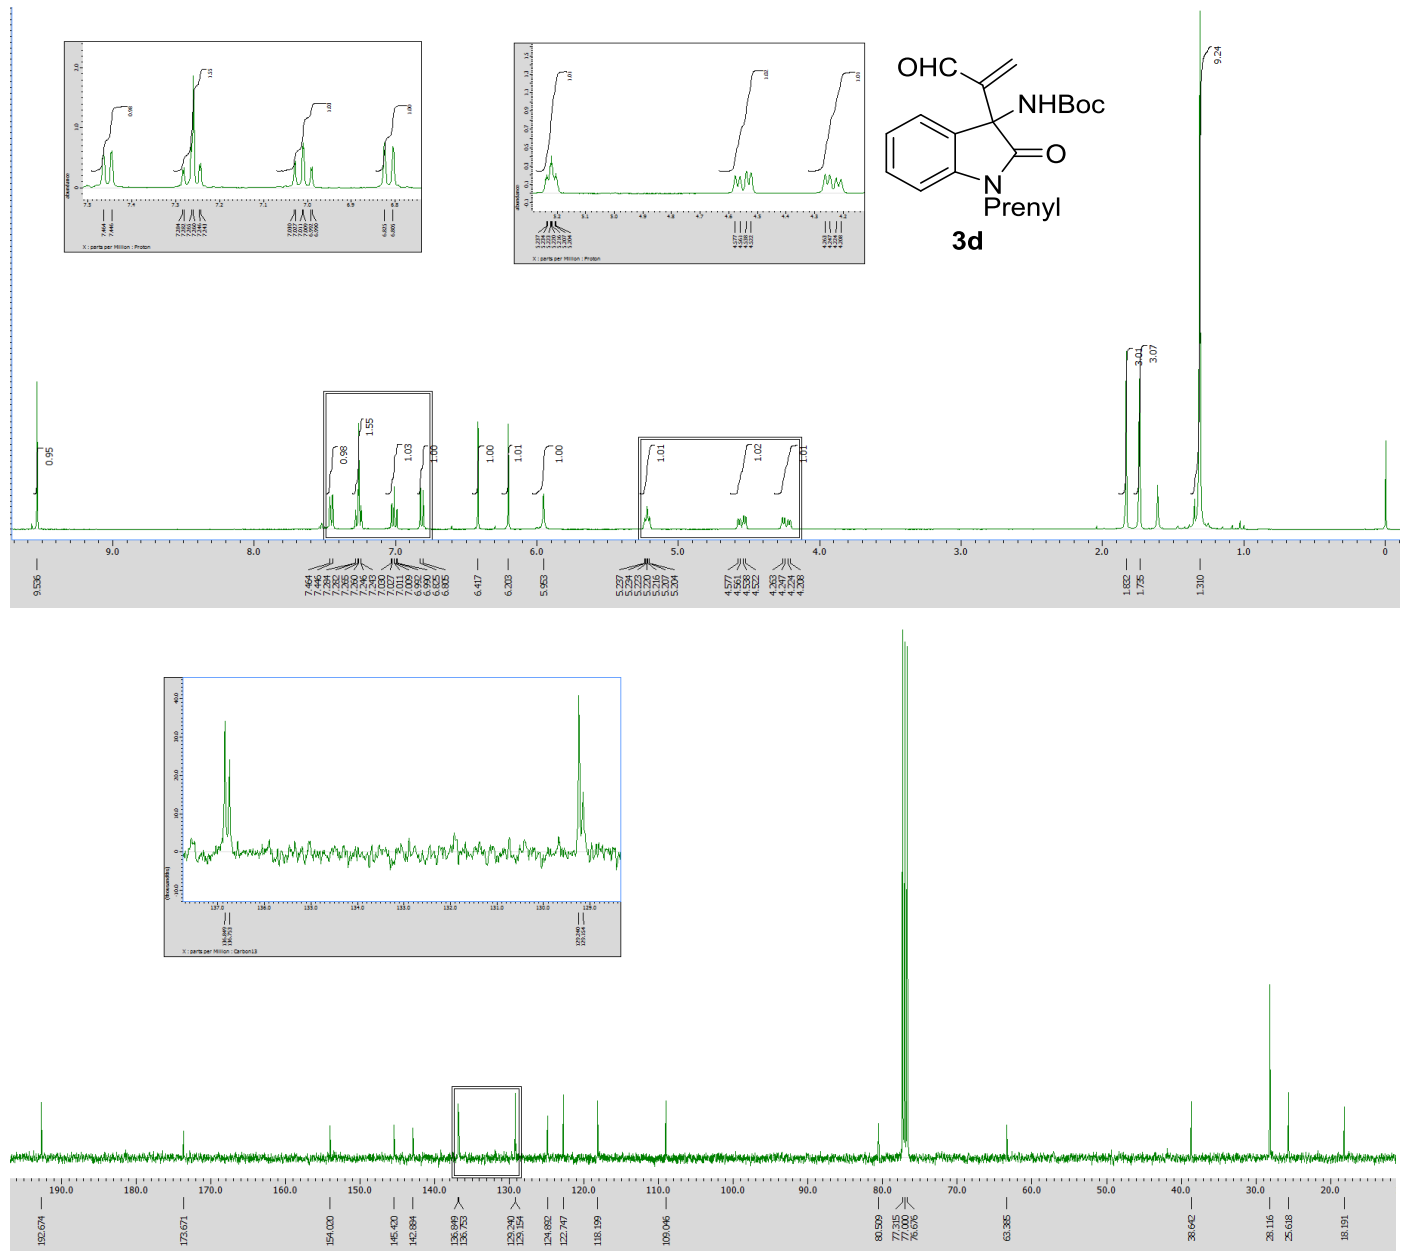



<sup>1</sup>H and <sup>13</sup>C-NMR spectra of 3f

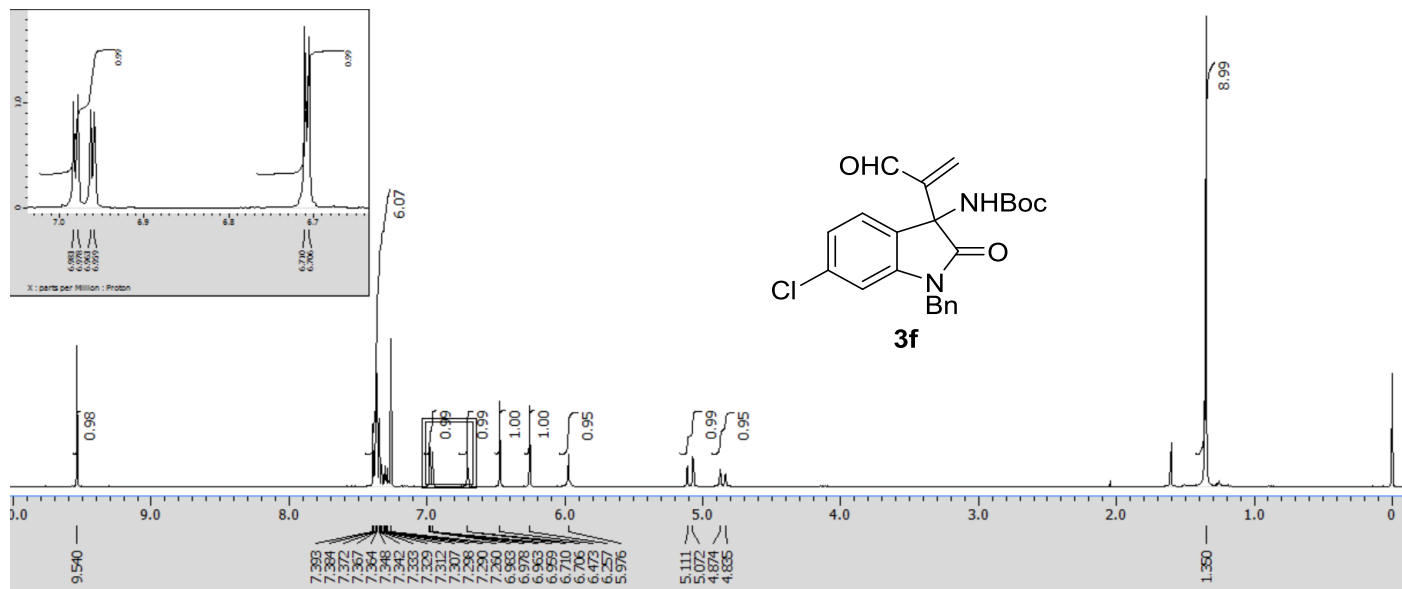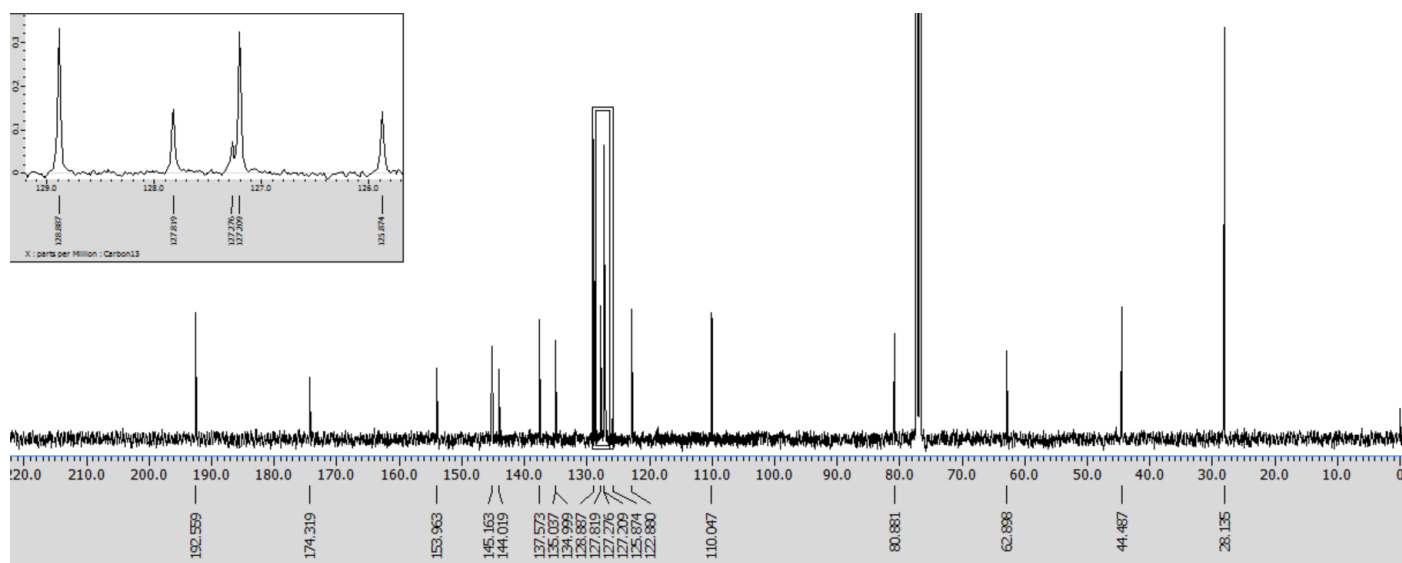

# <sup>1</sup>H and <sup>13</sup>C-NMR spectra of 3g

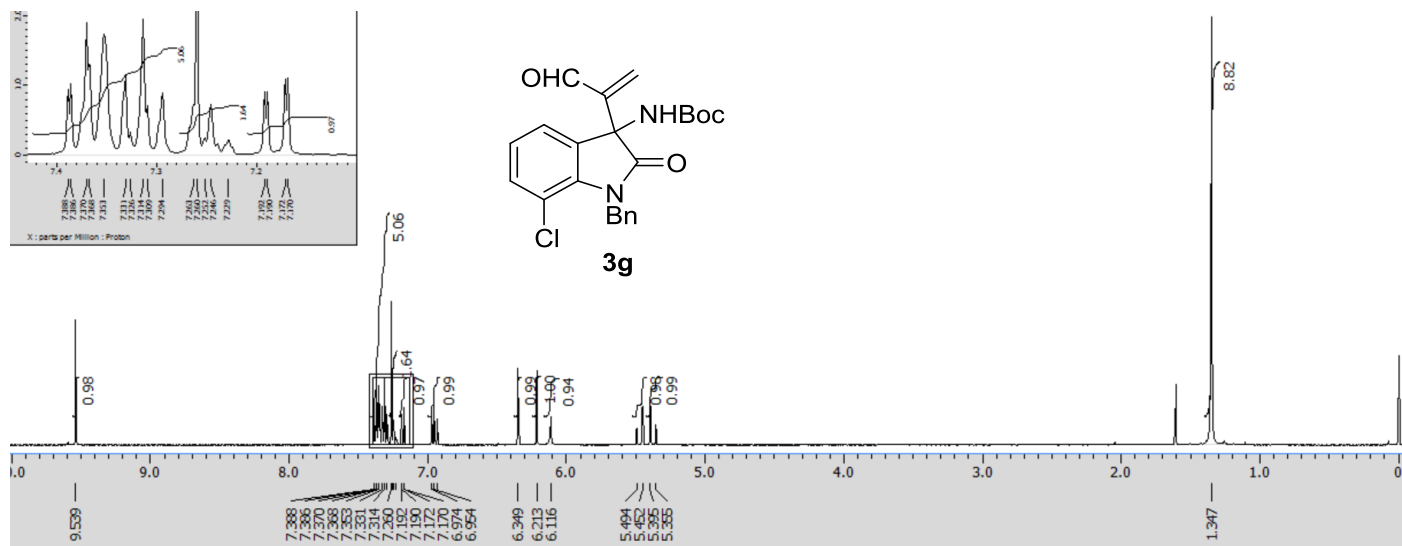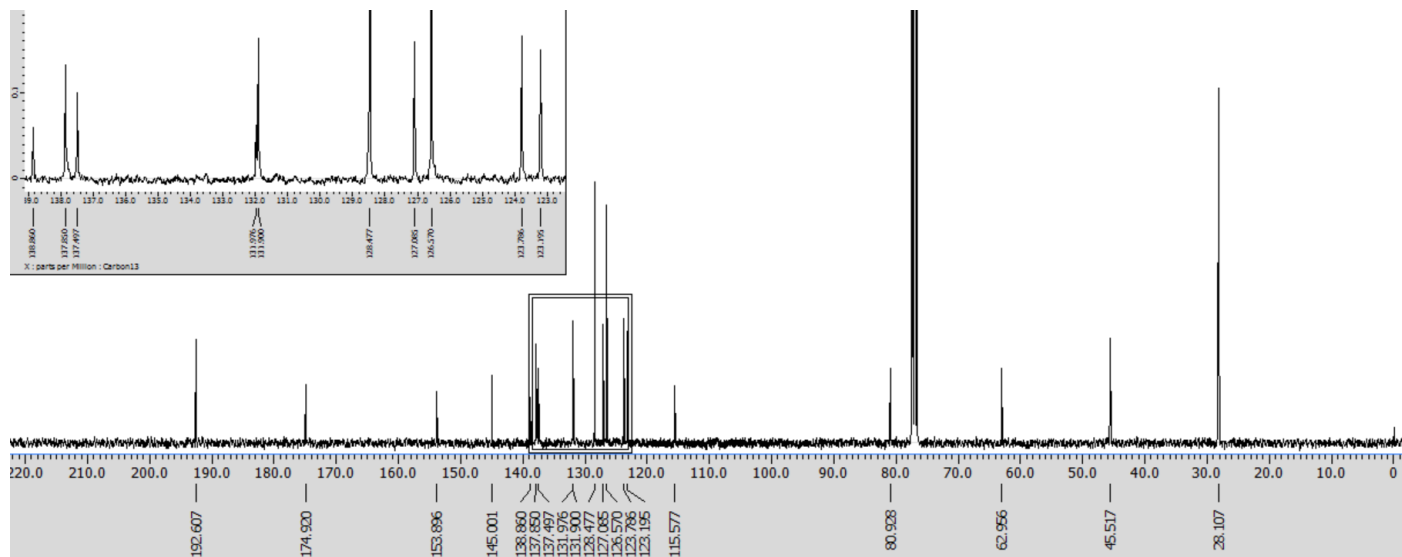



<sup>1</sup>H and <sup>13</sup>C-NMR spectra of 3h

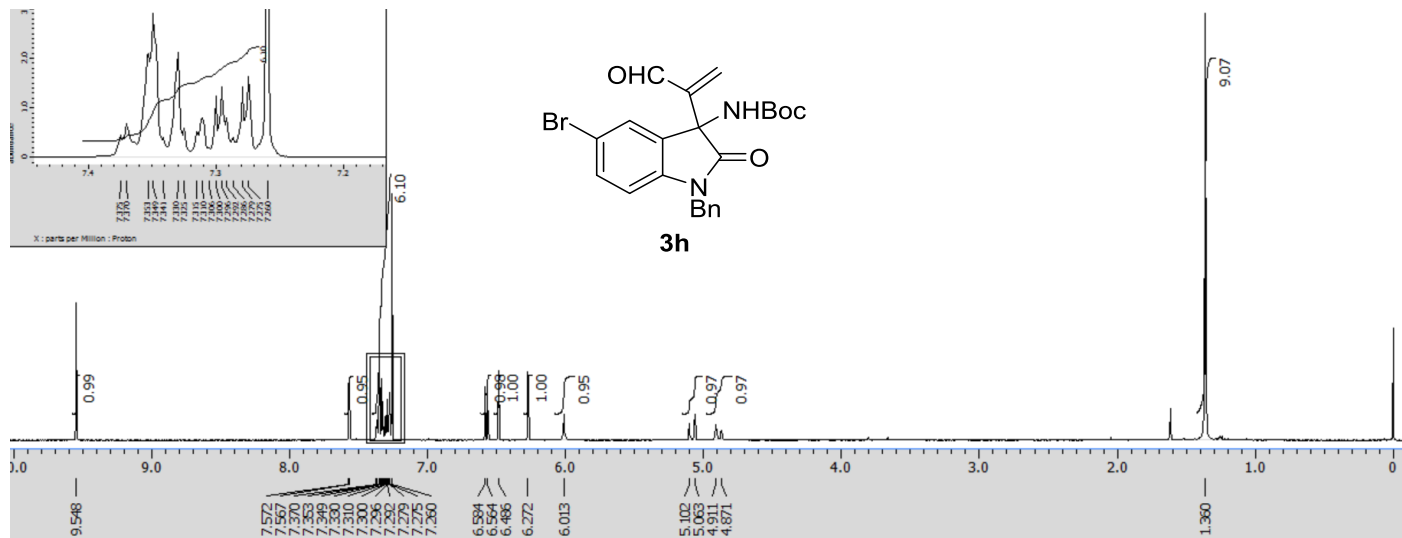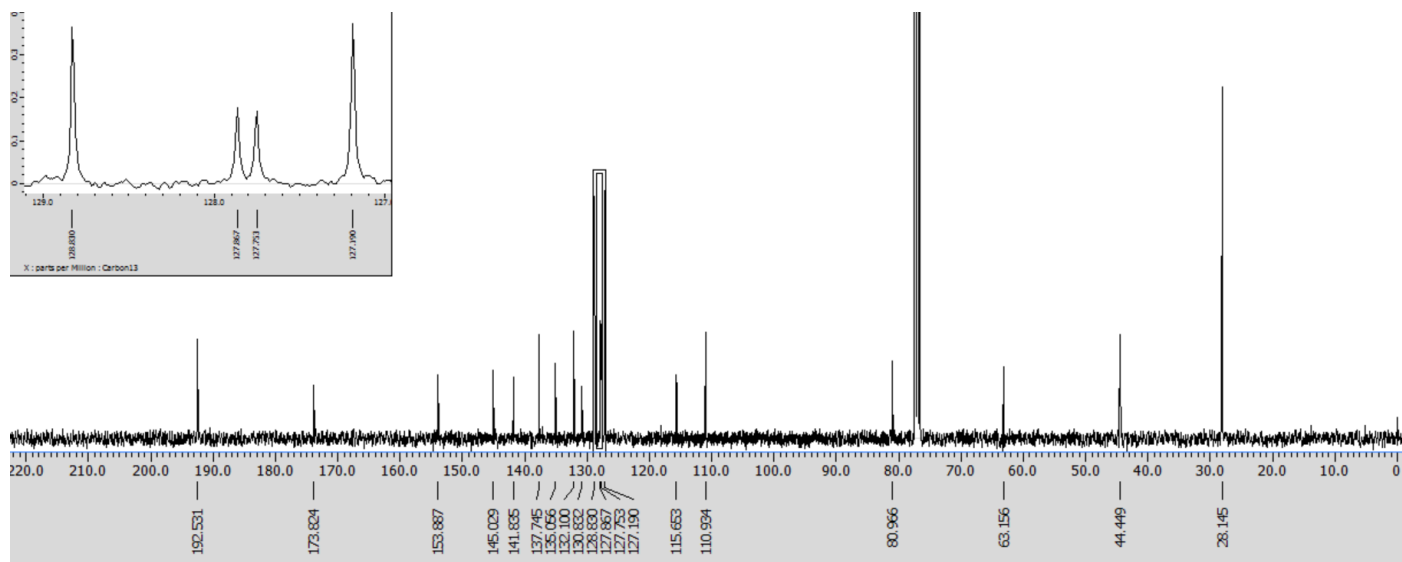

$^1\text{H}$ ,  $^{13}\text{C}$  and  $^{19}\text{F}$ -NMR spectra of **3i**

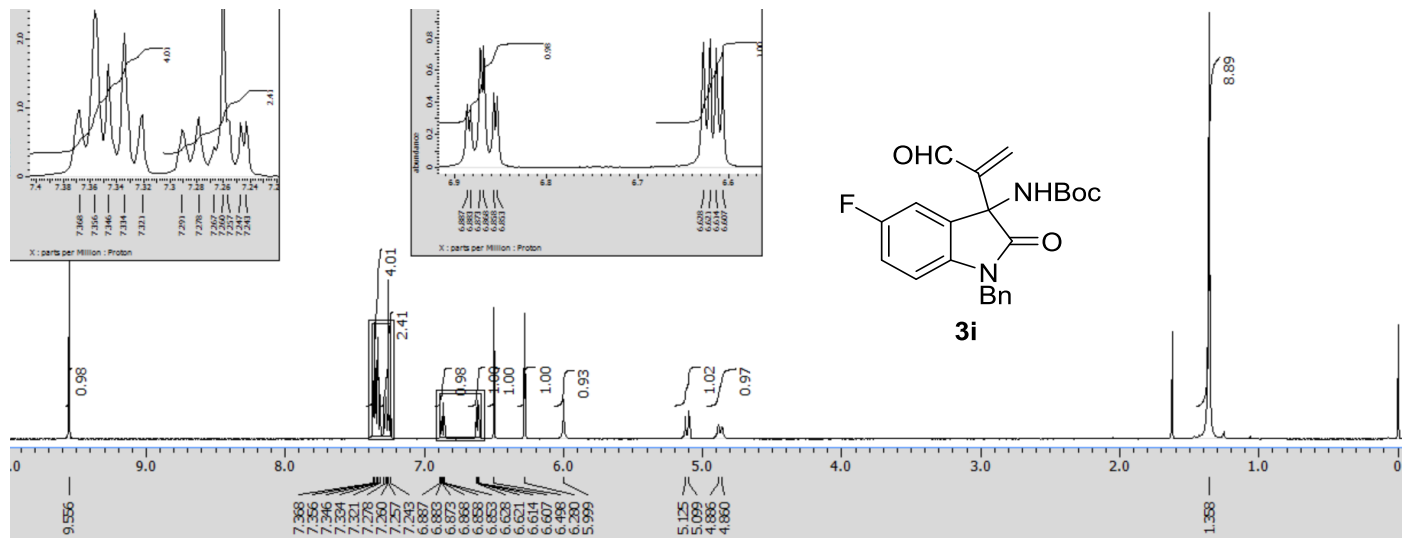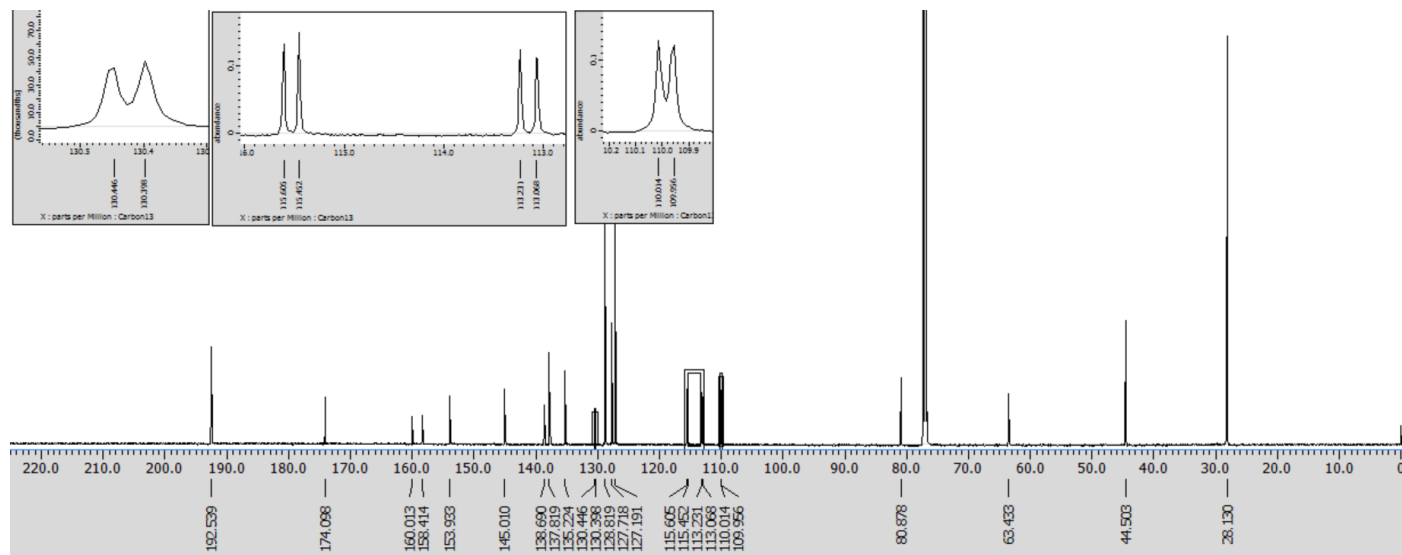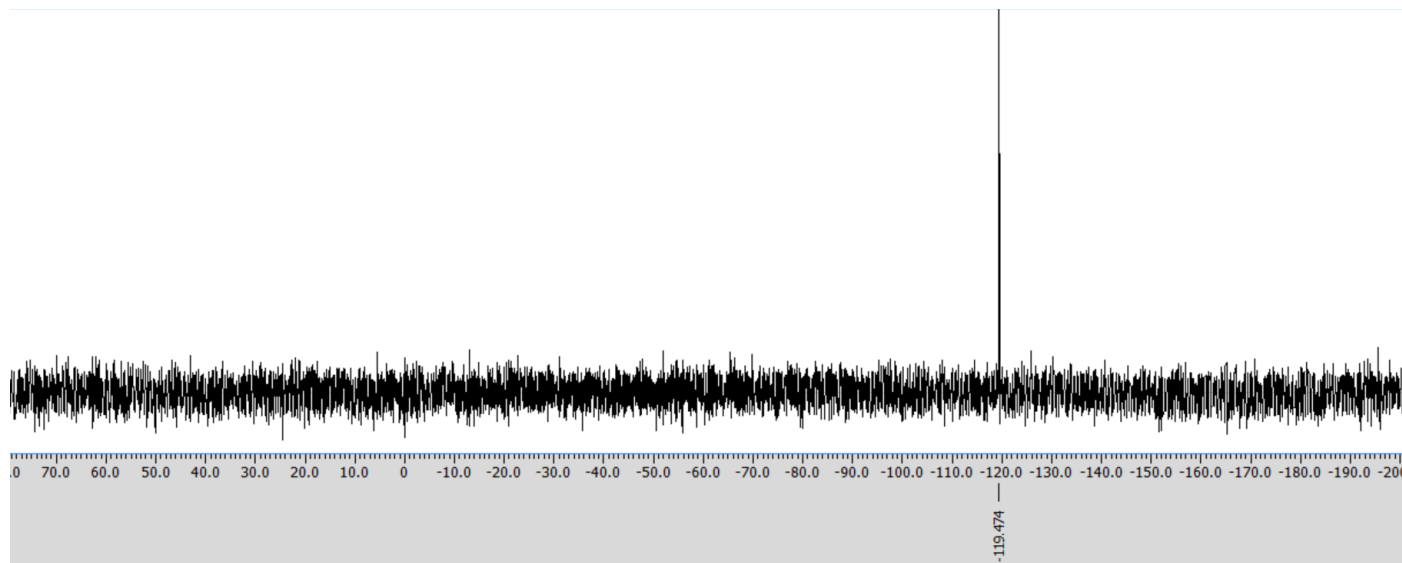

<sup>1</sup>H and <sup>13</sup>C-NMR spectra of 3j

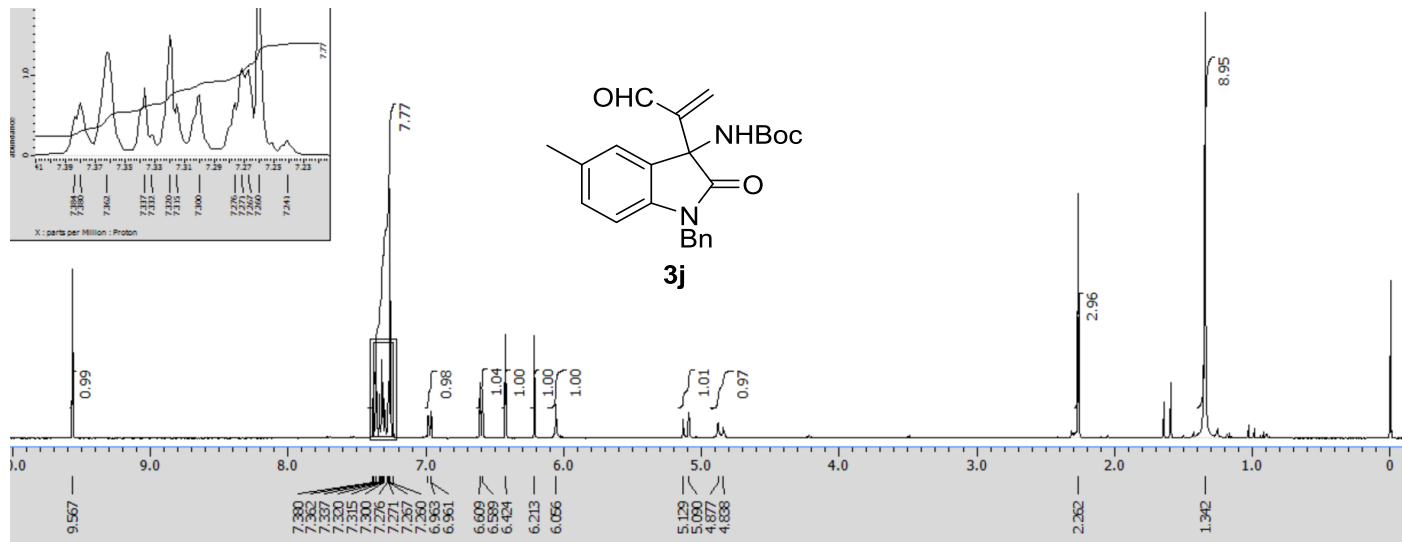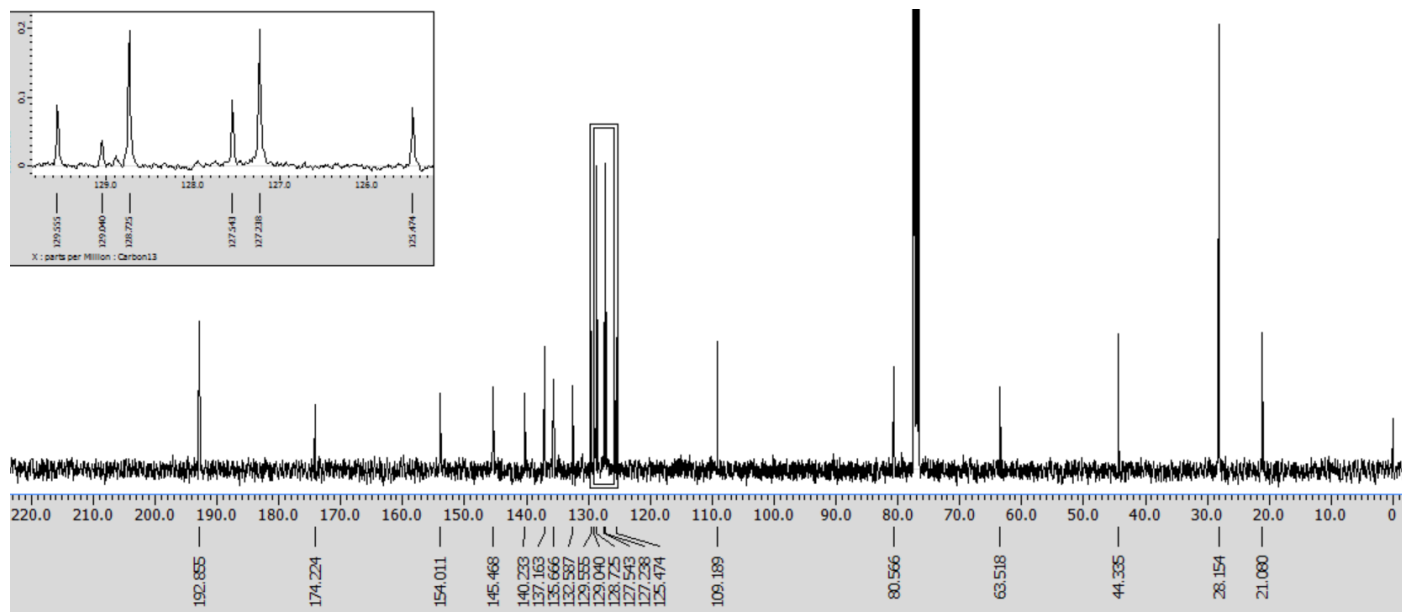

$^1\text{H}$  and  $^{13}\text{C}$ -NMR spectra of **3k**

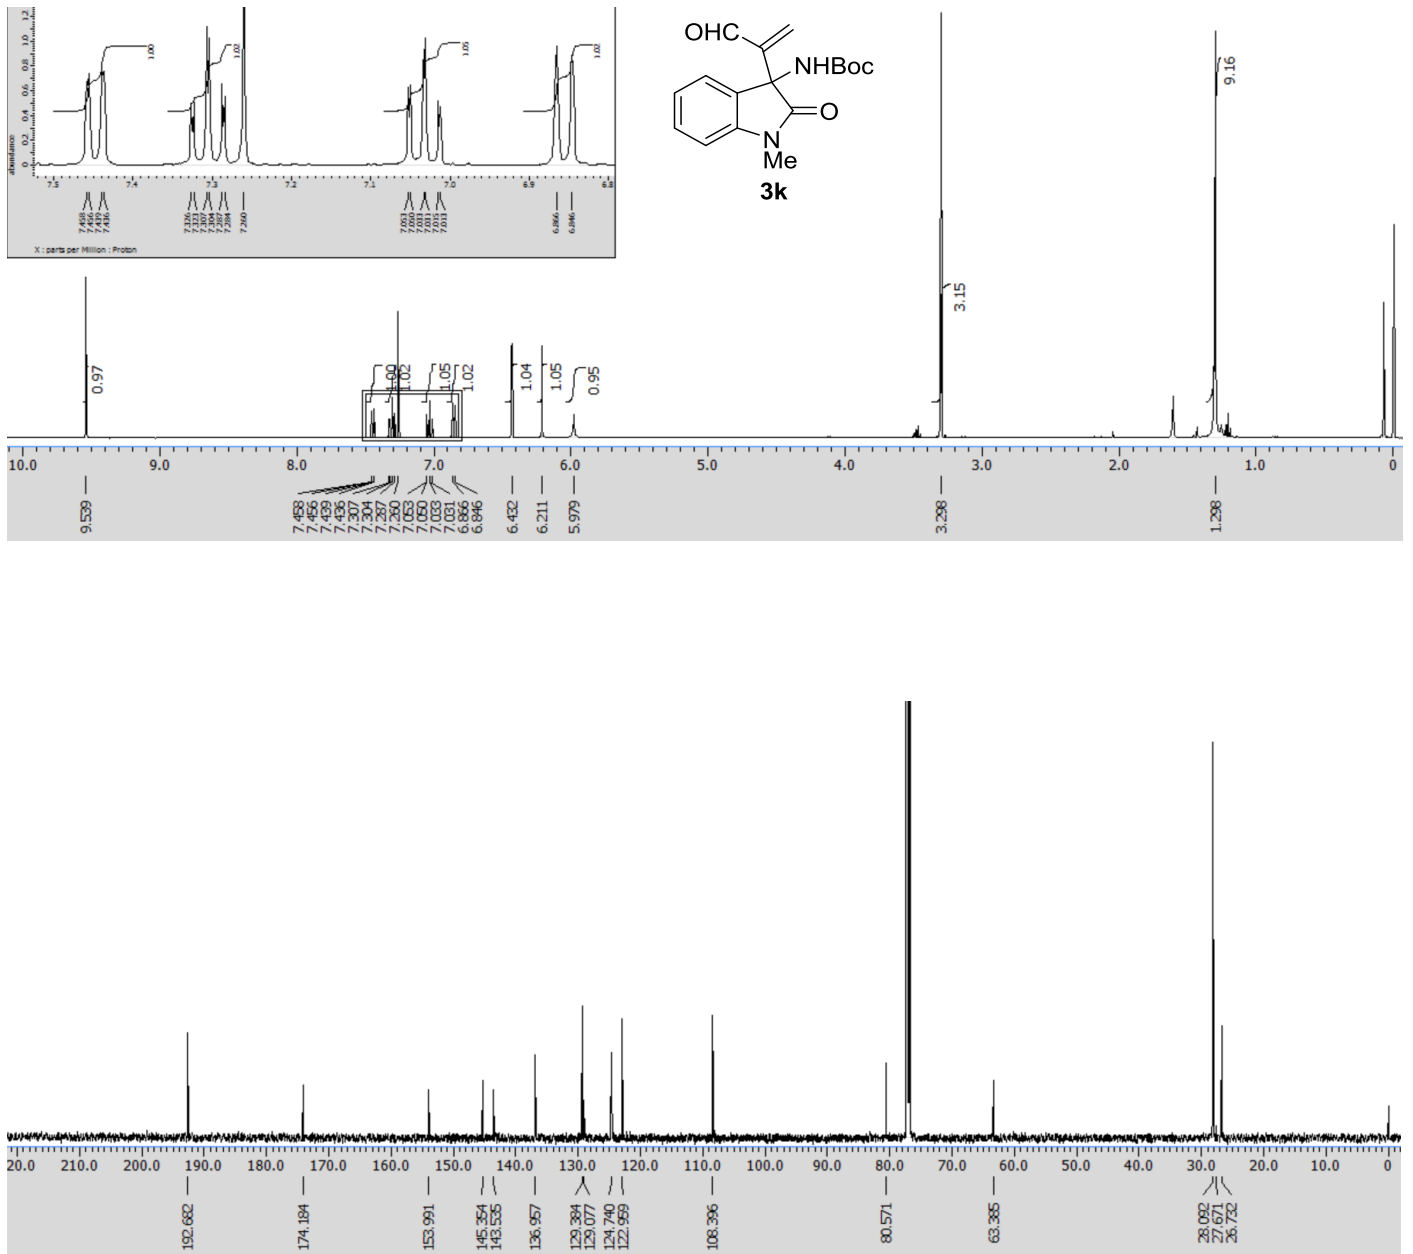

<sup>1</sup>H-NMR spectrum of 3I

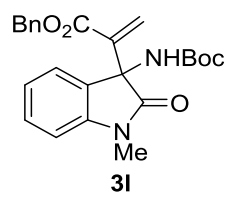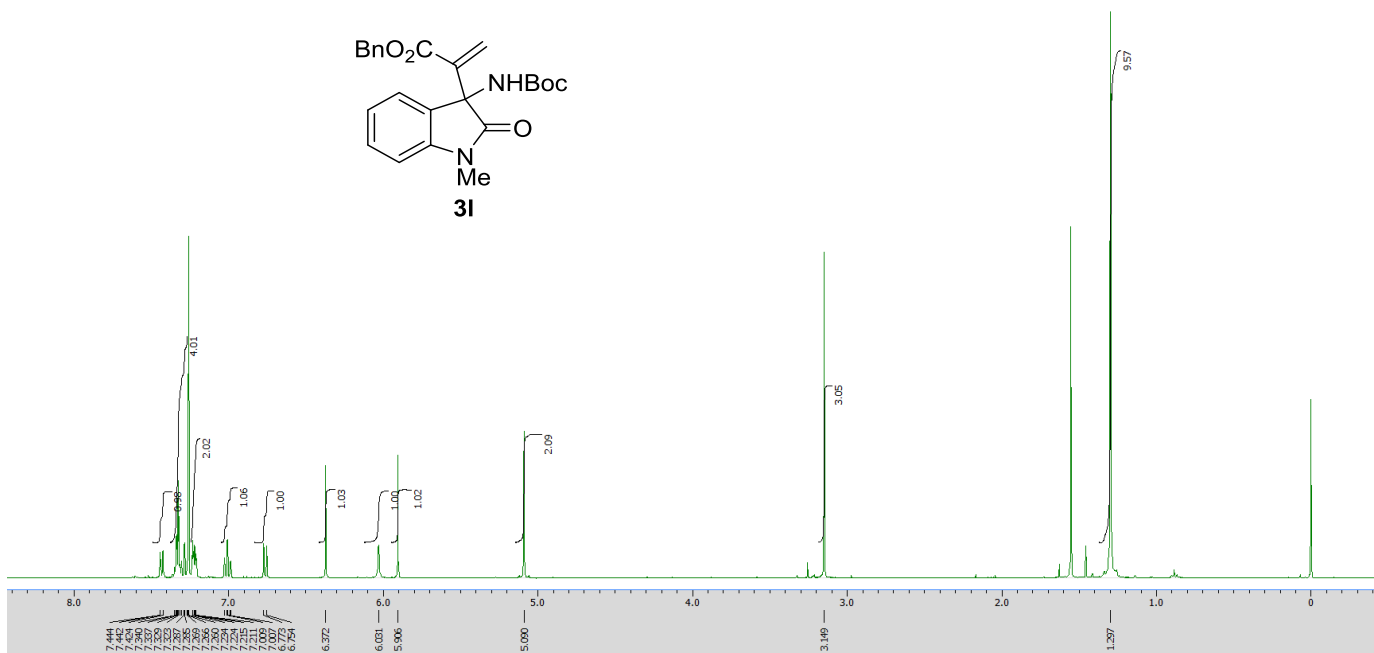

<sup>1</sup>H and <sup>13</sup>C-NMR spectra of 7a

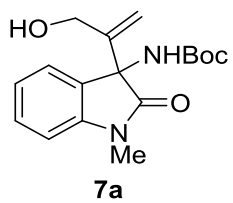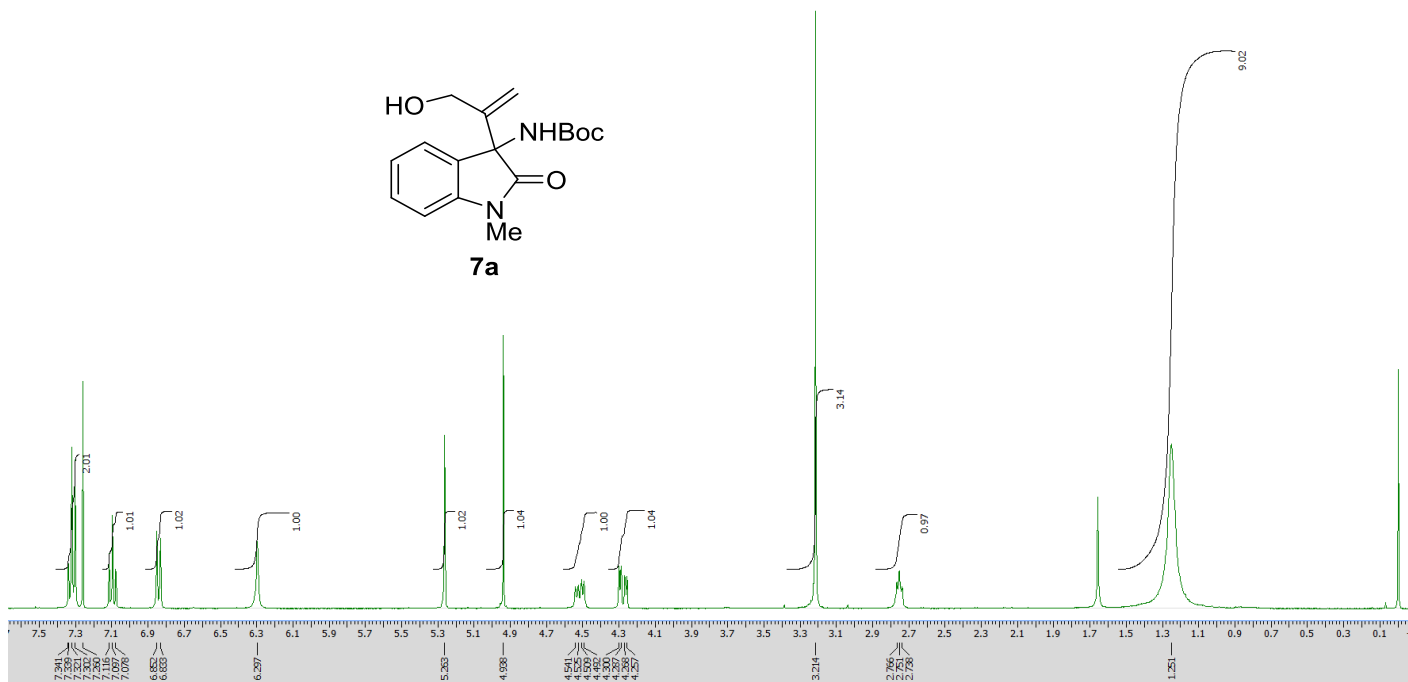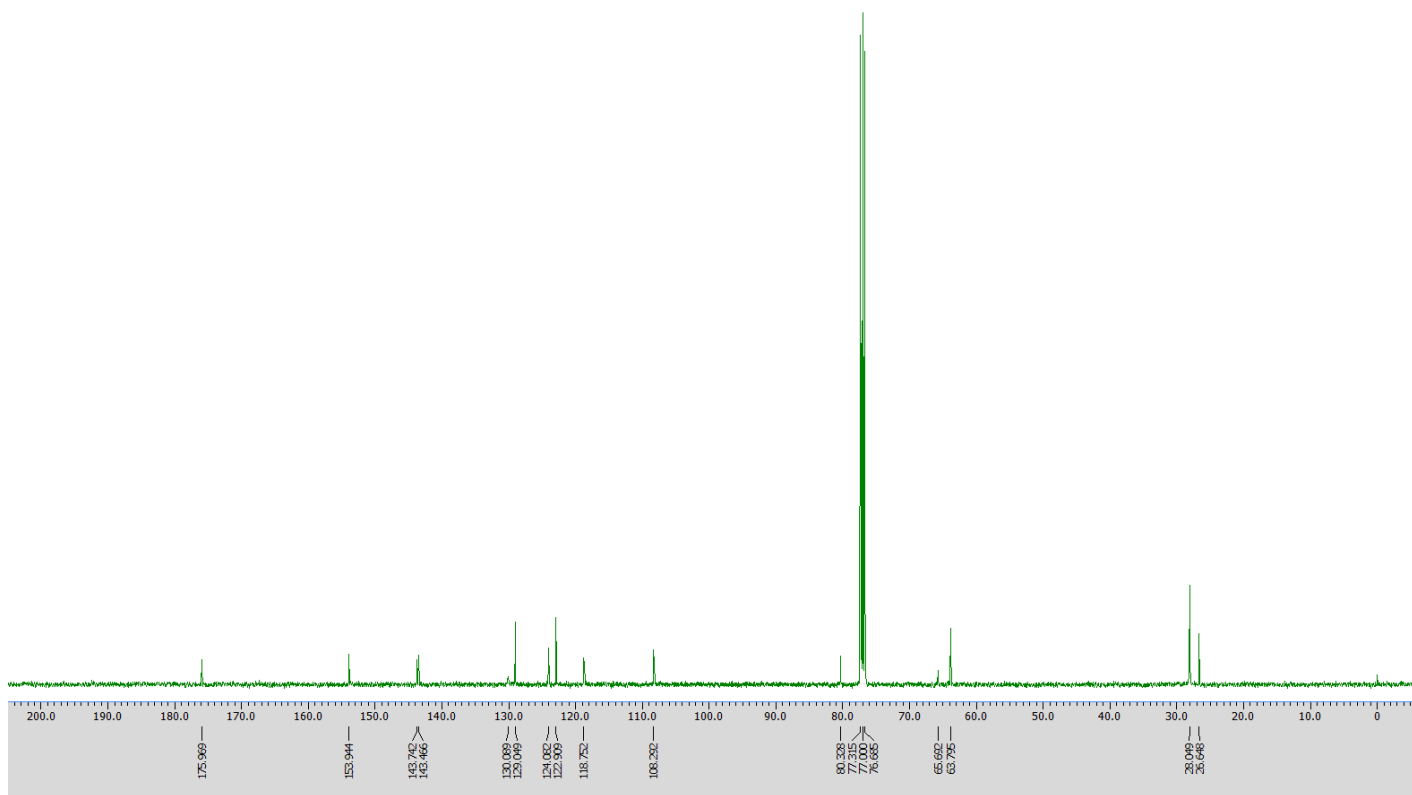

<sup>1</sup>H and <sup>13</sup>C-NMR spectra of 7b

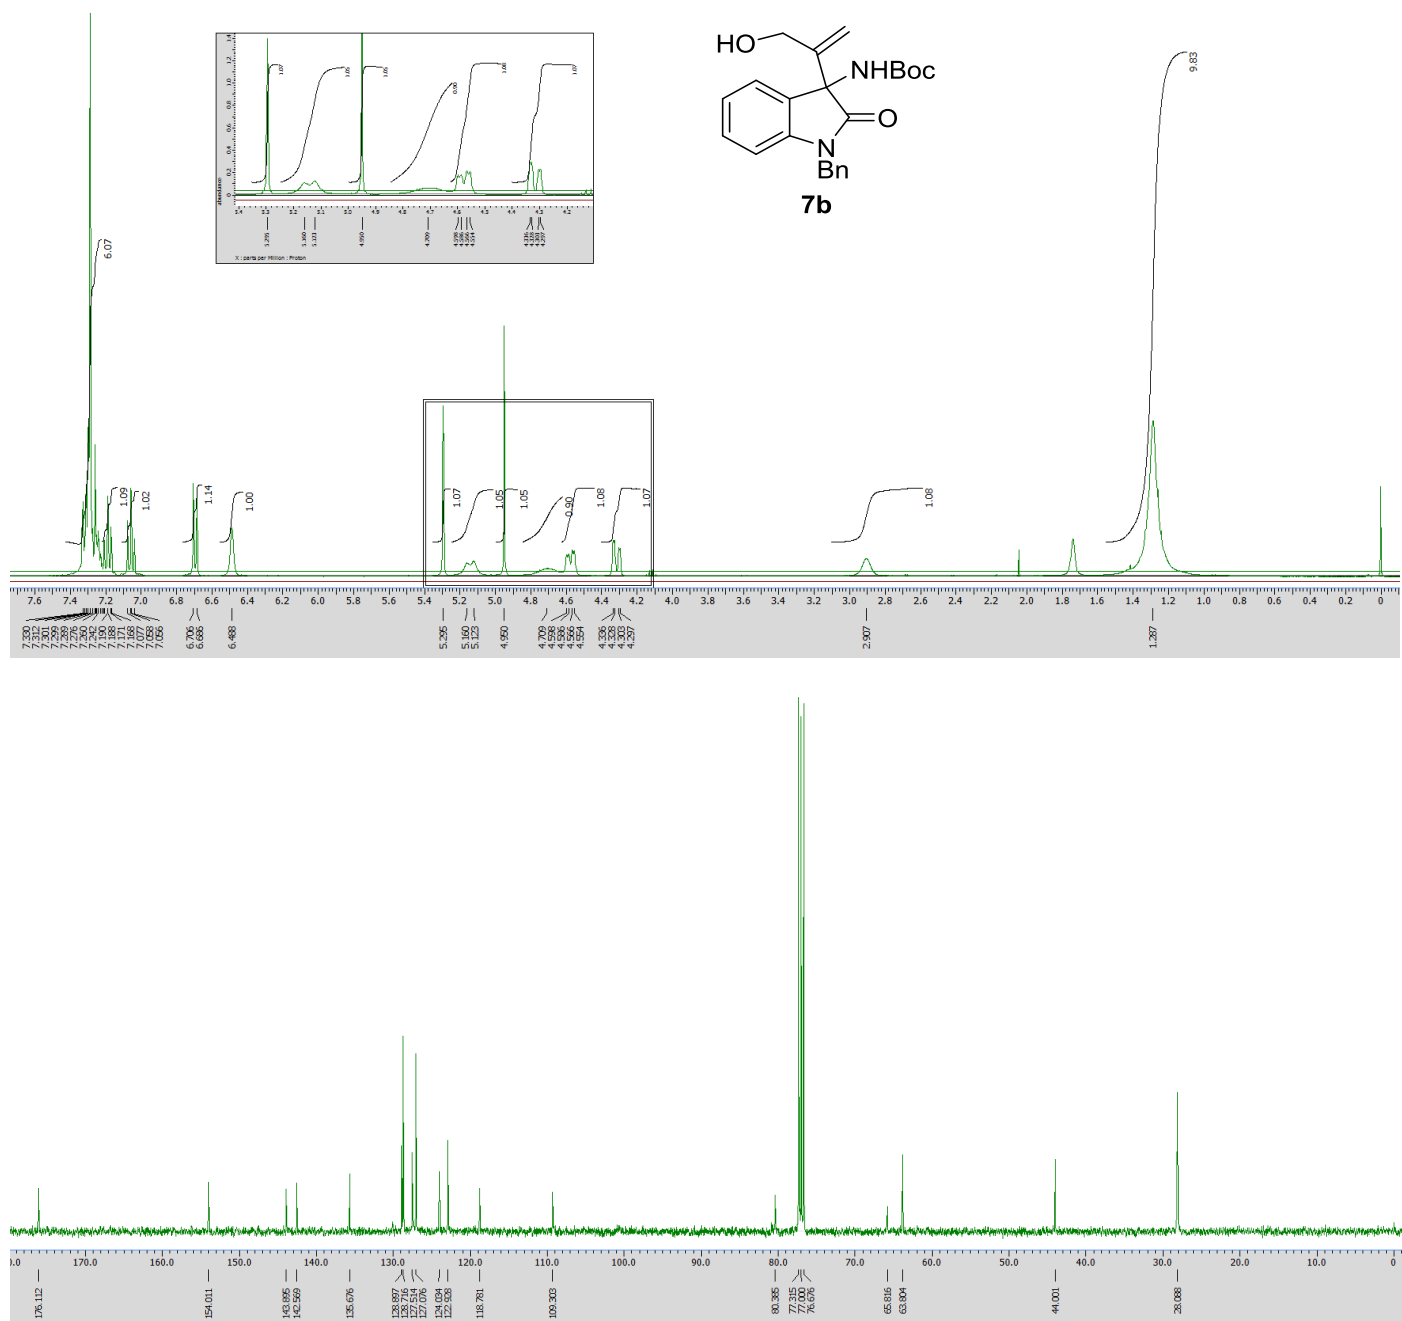

<sup>1</sup>H and <sup>13</sup>C-NMR spectra of 9

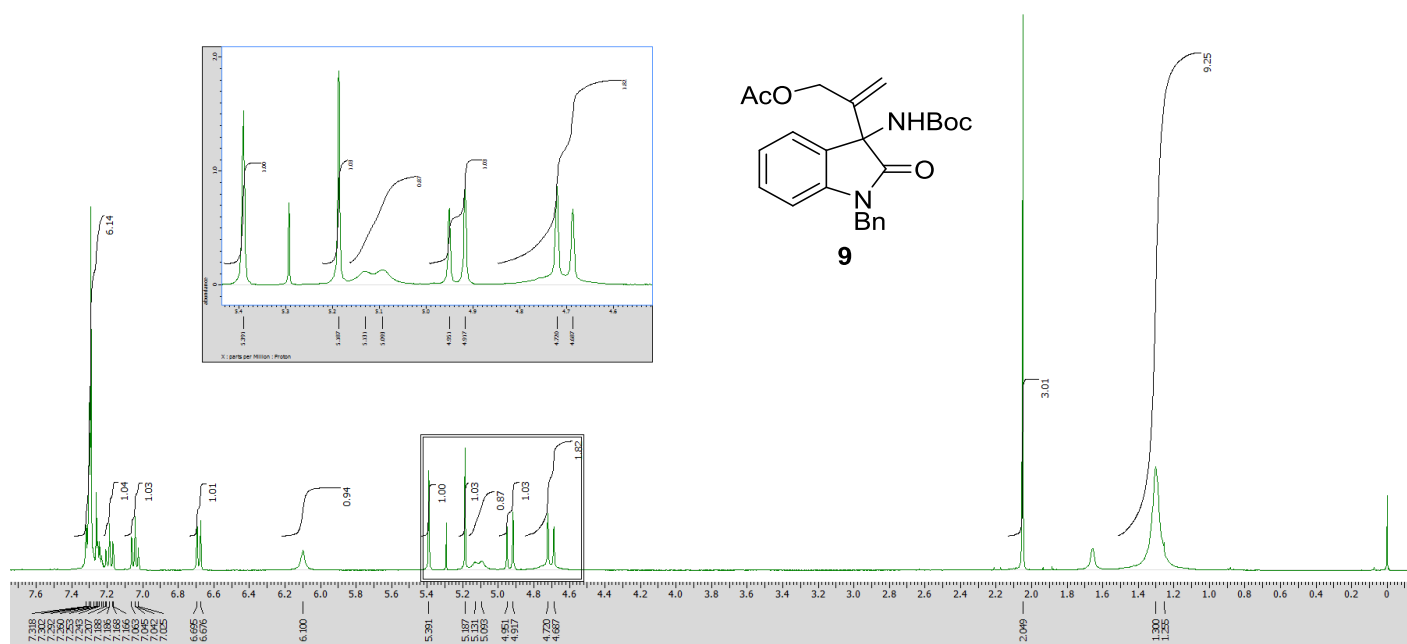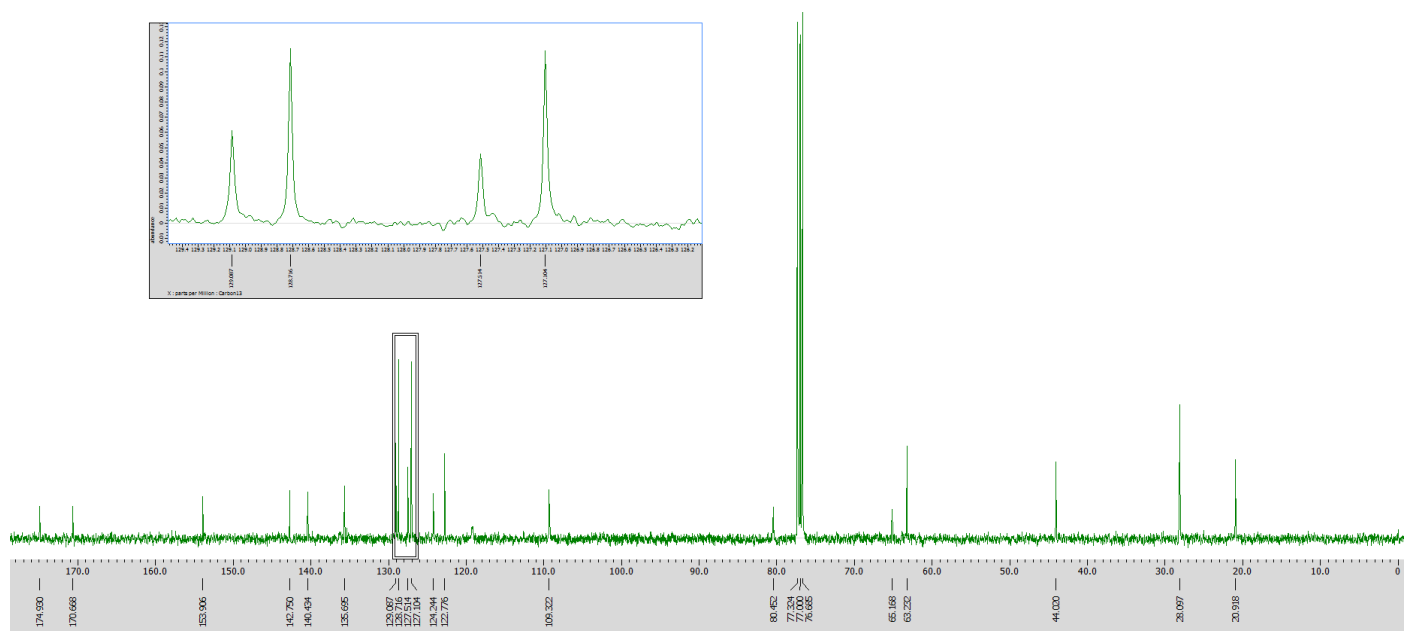



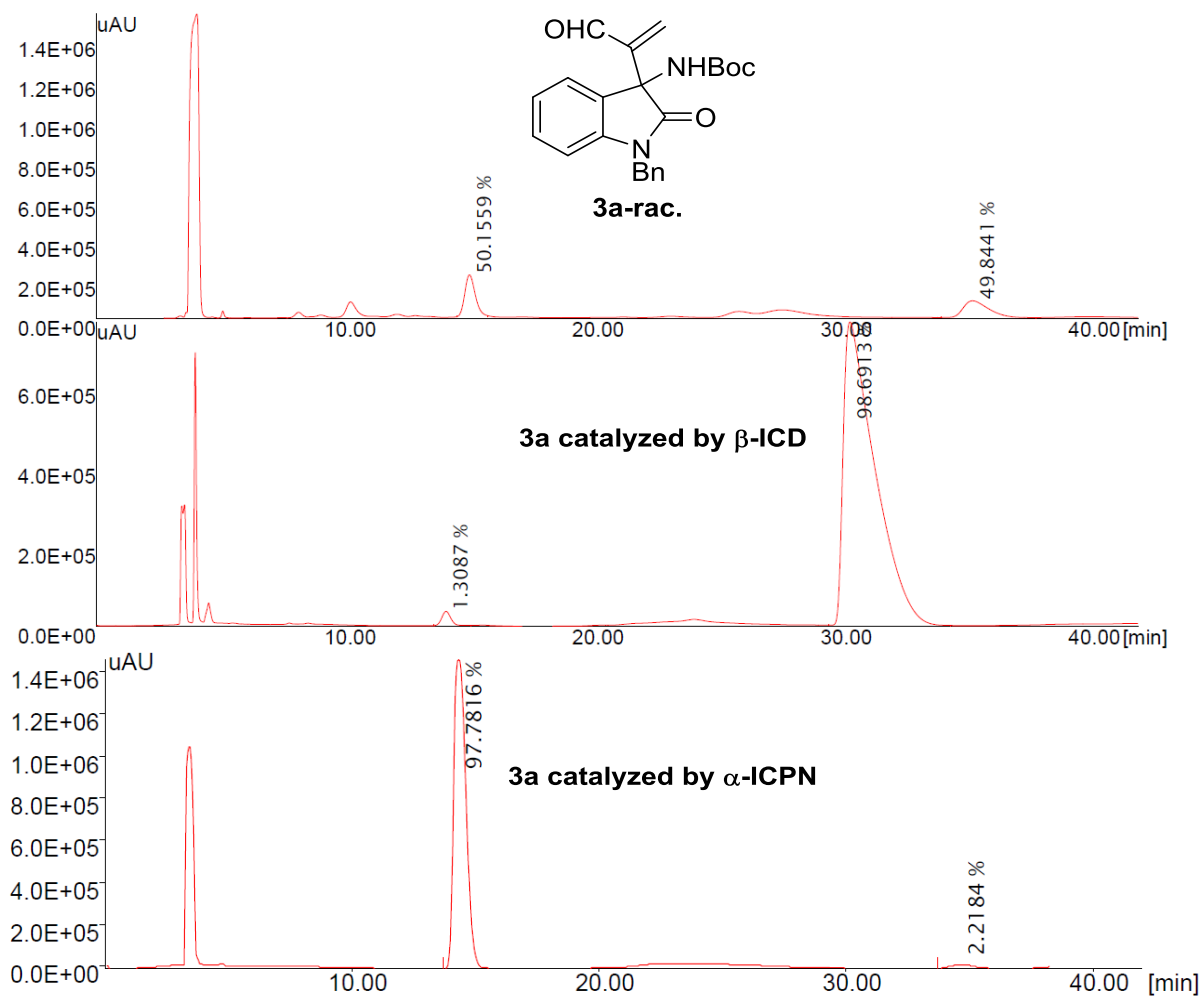

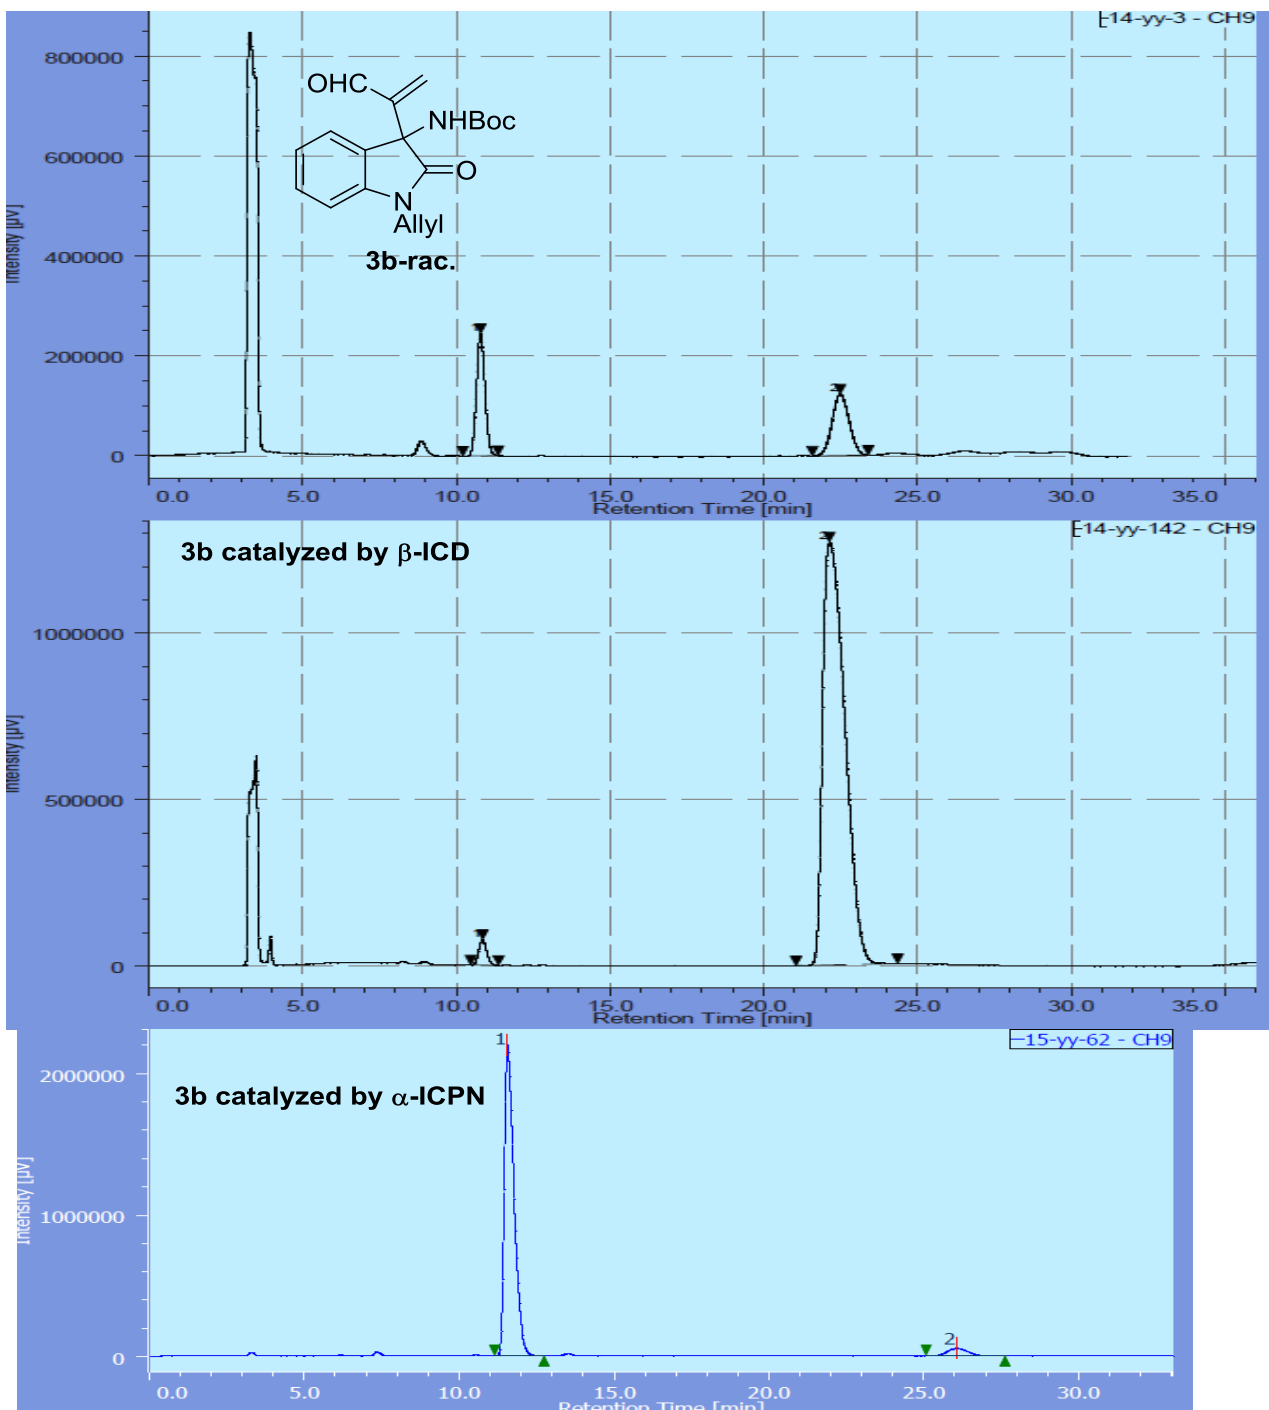

Channel & Peak Information Table

Chromatogram Name 14-yy-3-CH9

Sample Name

Channel Name 212.0nm

| # | Peak Name | CH | tR [min] | Area [ $\mu$ V $\cdot$ sec] | Height [ $\mu$ V] | Area%  | Height% | Quantity | NTP  | Resolution | Symmetry Factor | Warning |
|---|-----------|----|----------|-----------------------------|-------------------|--------|---------|----------|------|------------|-----------------|---------|
| 1 | Unknown   | 9  | 10.778   | 4733012                     | 244565            | 49.926 | 66.499  | N/A      | 7023 | 15.198     | 1.089           |         |
| 2 | Unknown   | 9  | 22.487   | 4747119                     | 123209            | 50.074 | 33.501  | N/A      | 7619 | N/A        | 1.049           |         |

| # | Peak Name | CH | tR [min] | Area [ $\mu$ V $\cdot$ sec] | Height [ $\mu$ V] | Area%  | Height% | Quantity | NTP  | Resolution | Symmetry Factor | Warning |
|---|-----------|----|----------|-----------------------------|-------------------|--------|---------|----------|------|------------|-----------------|---------|
| 1 | Unknown   | 9  | 10.843   | 1376400                     | 76833             | 2.120  | 5.697   | N/A      | 8365 | 12.221     | 1.090           |         |
| 2 | Unknown   | 9  | 22.135   | 63557090                    | 1271909           | 97.880 | 94.303  | N/A      | 4125 | N/A        | 1.784           |         |

| # | Peak Name | CH | tR [min] | Area [ $\mu$ V $\cdot$ sec] | Height [ $\mu$ V] | Area%  | Height% | Quantity | NTP  | Resolution | Symmetry Factor | Warning |
|---|-----------|----|----------|-----------------------------|-------------------|--------|---------|----------|------|------------|-----------------|---------|
| 1 | Unknown   | 9  | 11.558   | 47935917                    | 2198716           | 95.058 | 97.629  | N/A      | 6488 | 16.157     | 1.724           |         |
| 2 | Unknown   | 9  | 26.042   | 2492148                     | 53391             | 4.942  | 2.371   | N/A      | 7247 | N/A        | 1.194           |         |

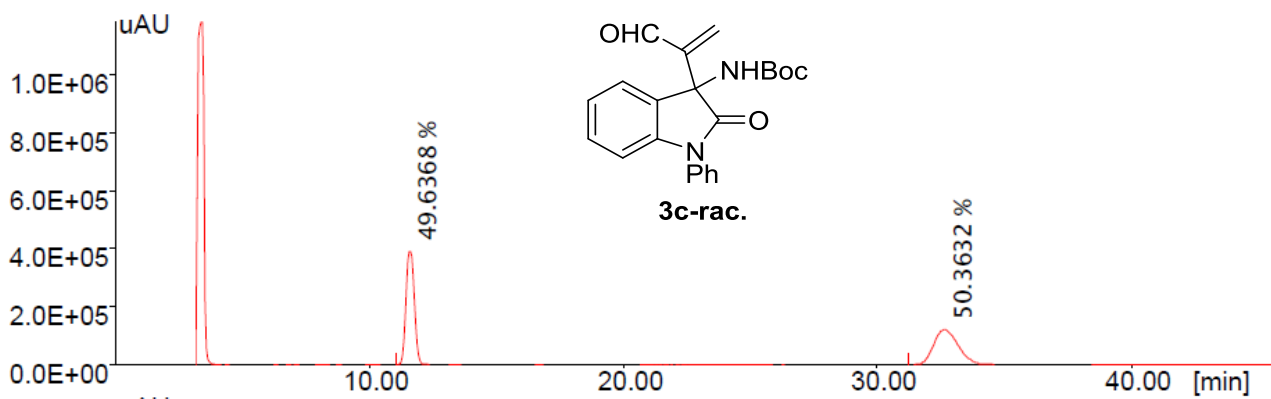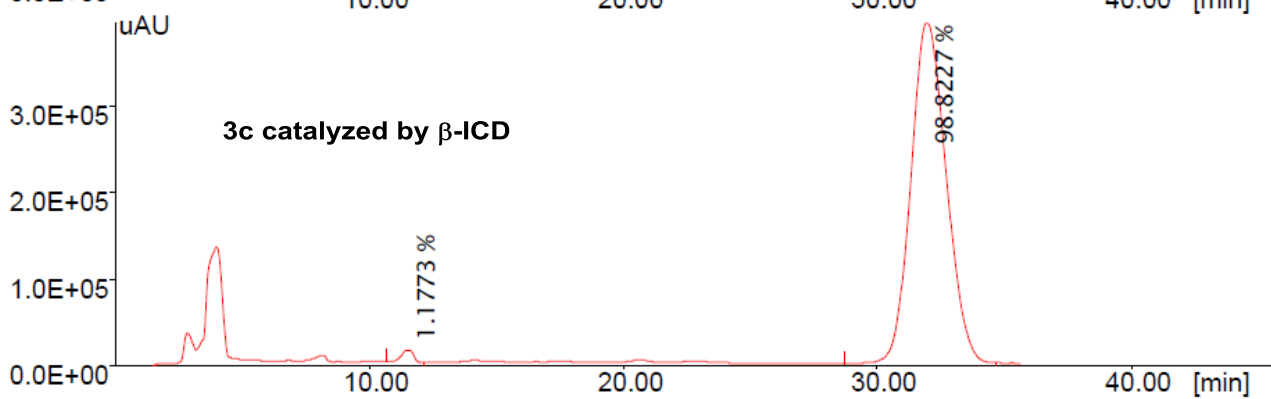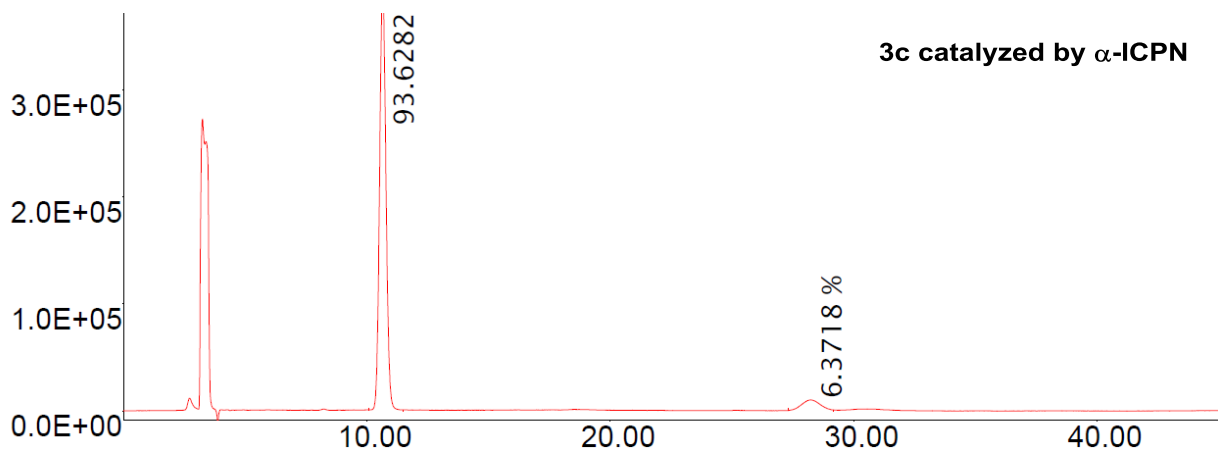

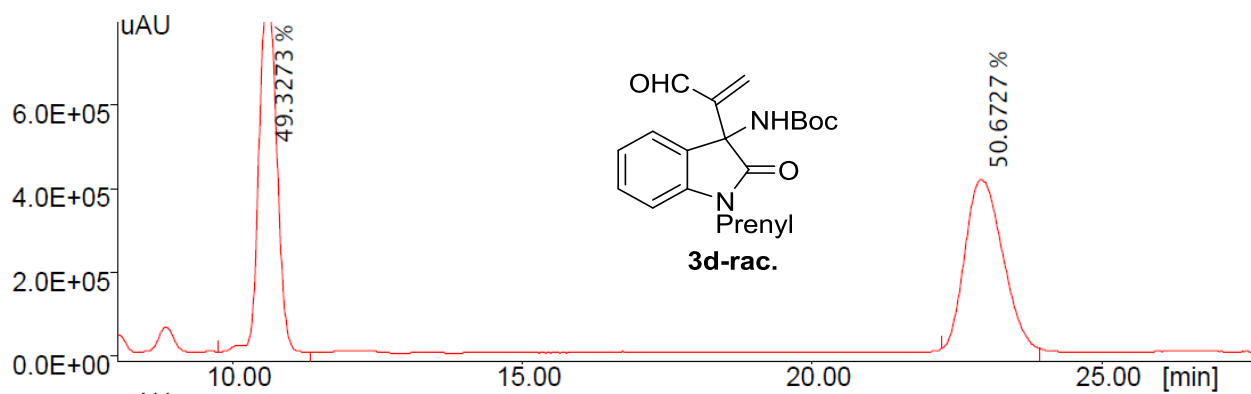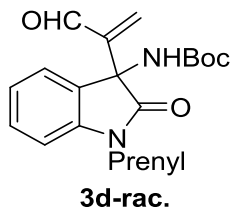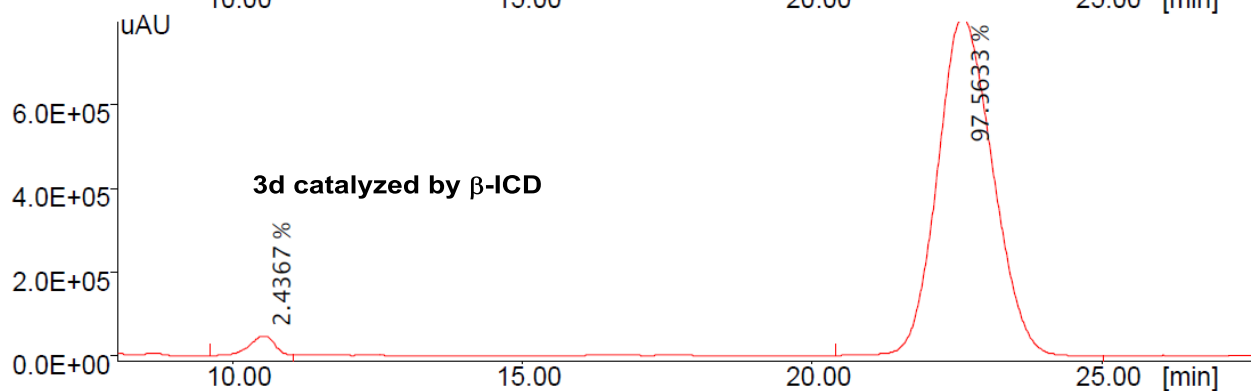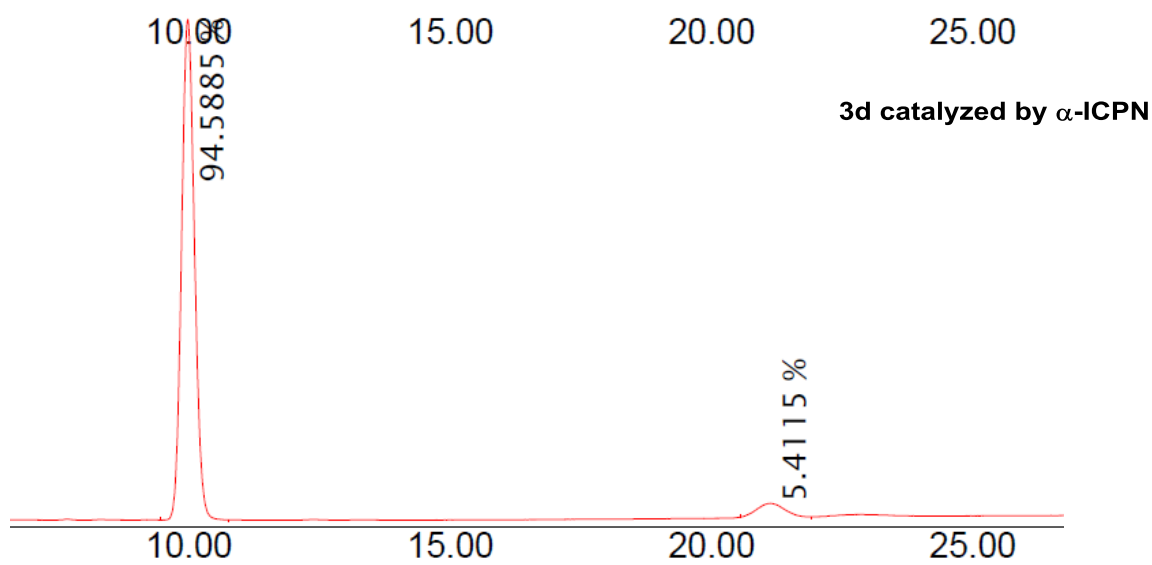

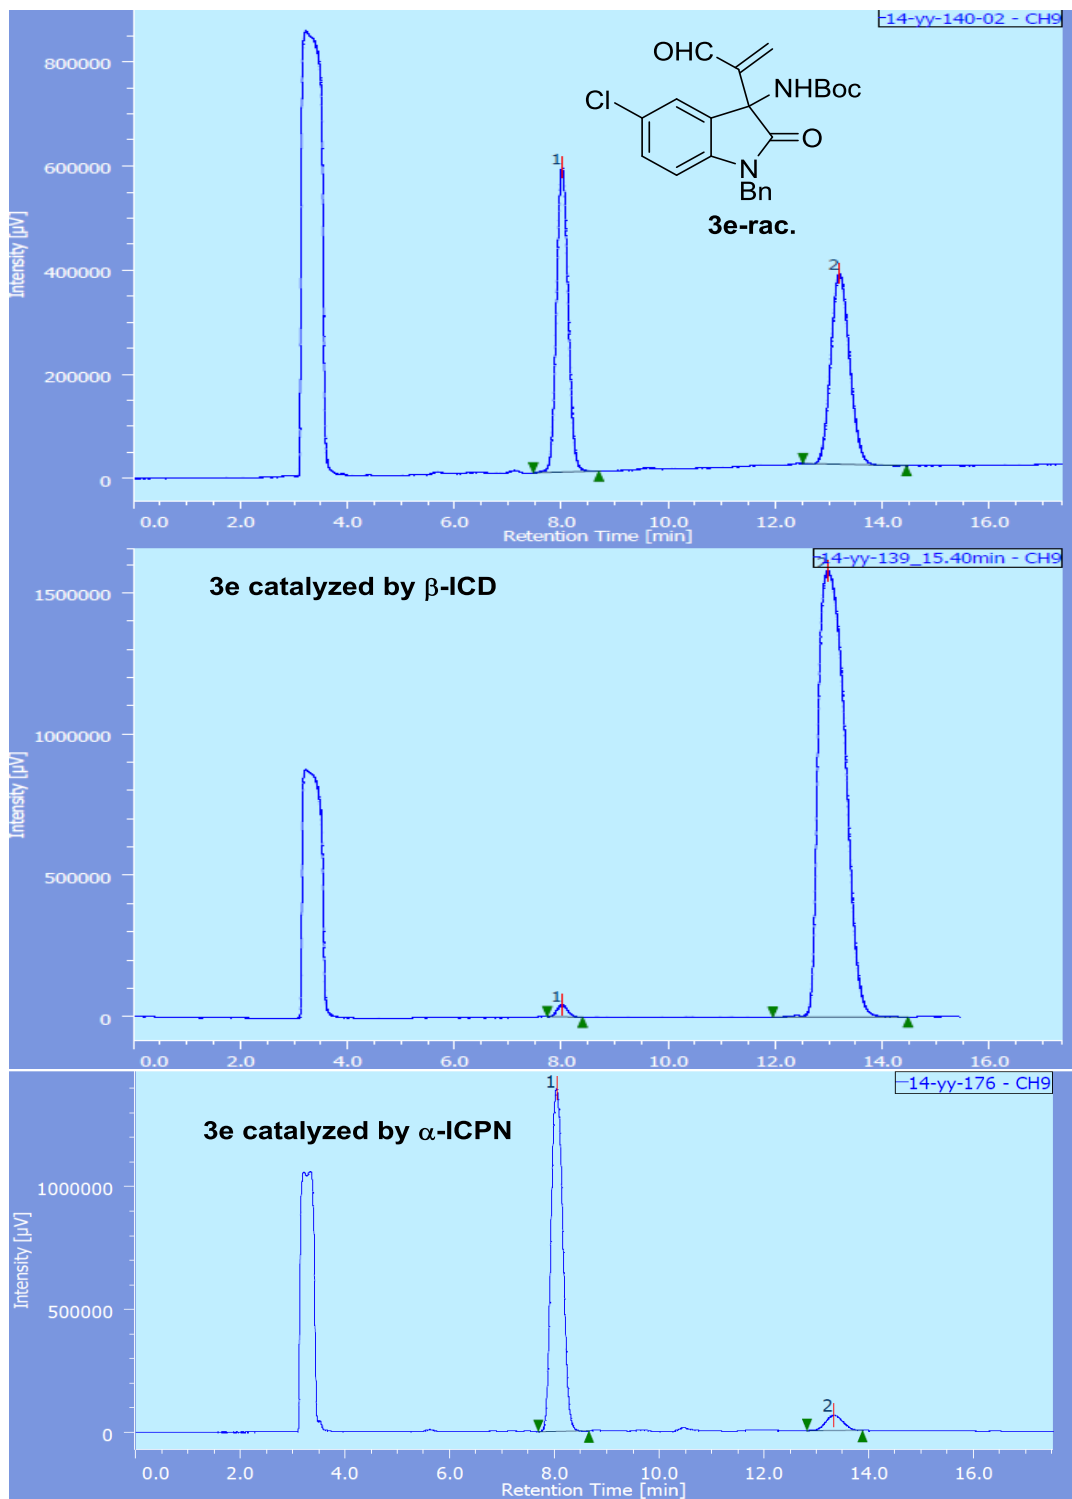

Channel & Peak Information Table

Chromatogram Name 14-yy-140-02-CH9

Sample Name

Channel Name 208.0nm

| # | Peak Name | CH | tR [min] | Area [ $\mu$ V $\cdot$ sec] | Height [ $\mu$ V] | Area%  | Height% | Quantity | NTP  | Resolution | Symmetry Factor | Warning |
|---|-----------|----|----------|-----------------------------|-------------------|--------|---------|----------|------|------------|-----------------|---------|
| 1 | Unknown   | 9  | 8.012    | 8887739                     | 585675            | 49.825 | 61.525  | N/A      | 6357 | 9.877      | 1.080           |         |
| 2 | Unknown   | 9  | 13.198   | 8950168                     | 366255            | 50.175 | 38.475  | N/A      | 6574 | N/A        | 1.124           |         |
| # | Peak Name | CH | tR [min] | Area [ $\mu$ V $\cdot$ sec] | Height [ $\mu$ V] | Area%  | Height% | Quantity | NTP  | Resolution | Symmetry Factor | Warning |
| 1 | Unknown   | 9  | 8.007    | 583931                      | 42691             | 1.058  | 2.630   | N/A      | 7601 | 7.452      | 1.075           |         |
| 2 | Unknown   | 9  | 12.977   | 54609934                    | 1580470           | 98.942 | 97.370  | N/A      | 2863 | N/A        | 1.513           |         |
| # | Peak Name | CH | tR [min] | Area [ $\mu$ V $\cdot$ sec] | Height [ $\mu$ V] | Area%  | Height% | Quantity | NTP  | Resolution | Symmetry Factor | Warning |
| 1 | Unknown   | 9  | 8.040    | 21673511                    | 1393702           | 93.712 | 95.725  | N/A      | 5698 | 10.110     | 1.110           |         |
| 2 | Unknown   | 9  | 13.325   | 1454370                     | 62238             | 6.288  | 4.275   | N/A      | 7338 | N/A        | 1.073           |         |

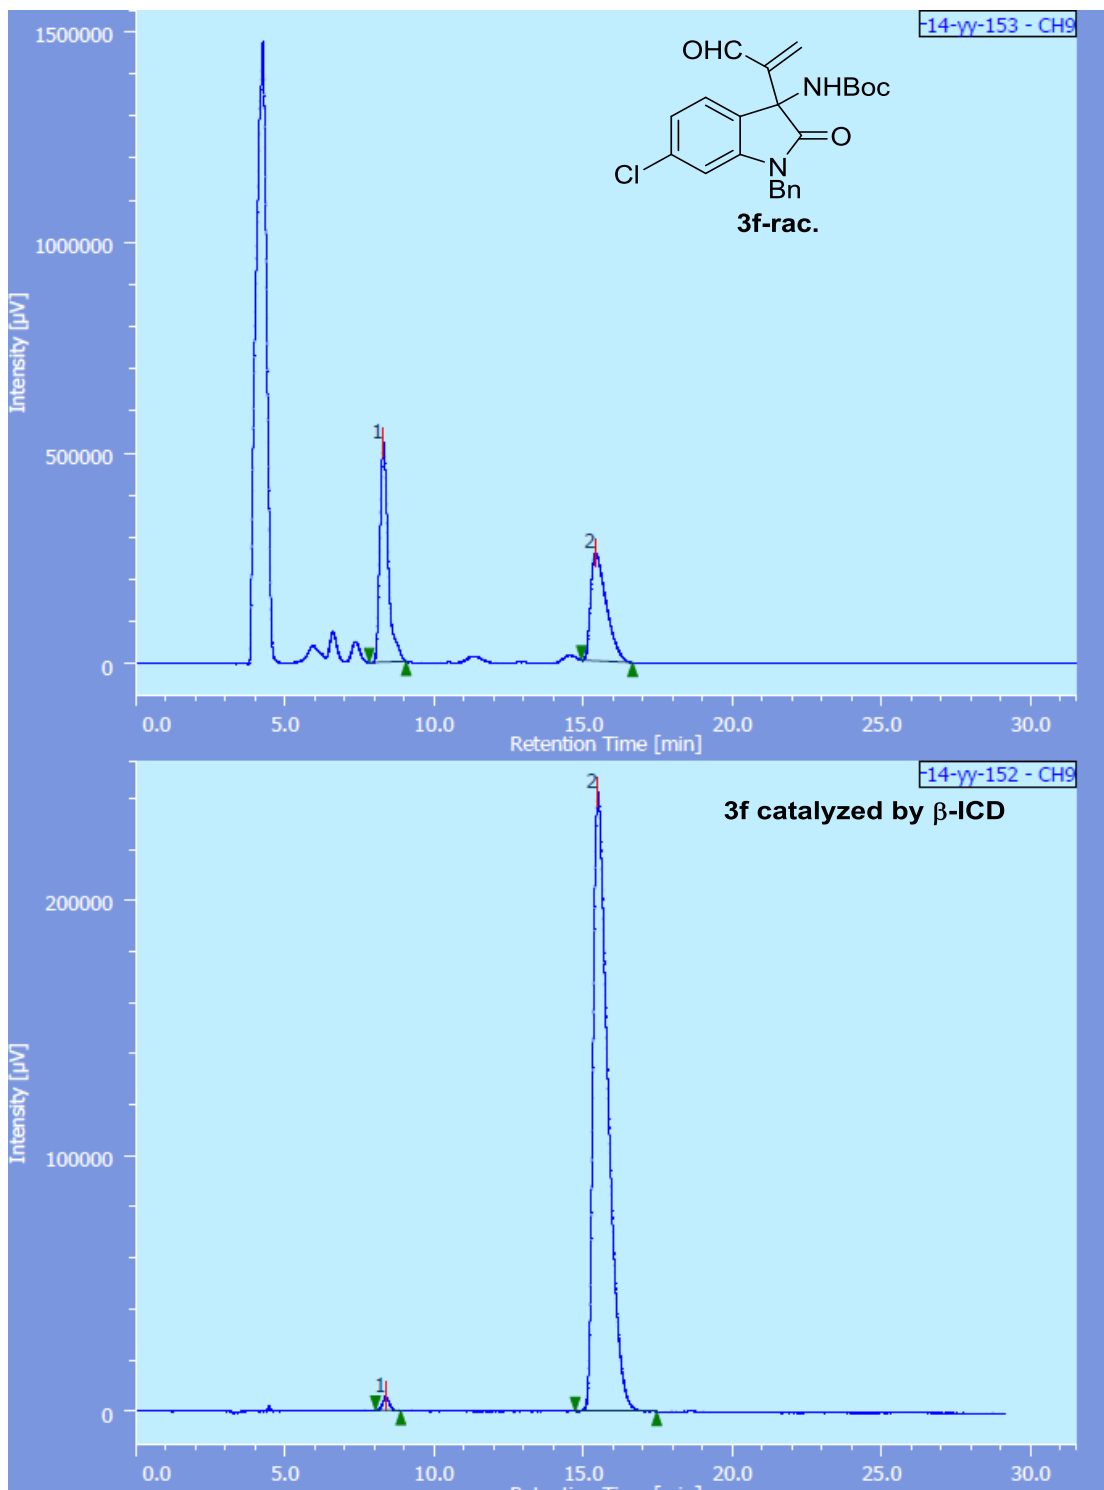

Channel & Peak Information Table

Chromatogram Name 14-yy-153-CH9

Sample Name

Channel Name 263.0nm

| # | Peak Name | CH | tR [min] | Area [ $\mu$ V-sec] | Height [ $\mu$ V] | Area%  | Height% | Quantity | NTP  | Resolution | Symmetry Factor | Warning |
|---|-----------|----|----------|---------------------|-------------------|--------|---------|----------|------|------------|-----------------|---------|
| 1 | Unknown   | 9  | 8.300    | 10081193            | 520572            | 51.860 | 67.012  | N/A      | 4880 | 9.935      | 1.619           |         |
| 2 | Unknown   | 9  | 15.417   | 9358182             | 256265            | 48.140 | 32.988  | N/A      | 4116 | N/A        | 1.853           |         |
| # | Peak Name | CH | tR [min] | Area [ $\mu$ V-sec] | Height [ $\mu$ V] | Area%  | Height% | Quantity | NTP  | Resolution | Symmetry Factor | Warning |
| 1 | Unknown   | 9  | 8.385    | 83870               | 5414              | 0.986  | 2.184   | N/A      | 6910 | 10.925     | 1.070           |         |
| 2 | Unknown   | 9  | 15.493   | 8421449             | 242513            | 99.014 | 97.816  | N/A      | 4728 | N/A        | 1.814           |         |

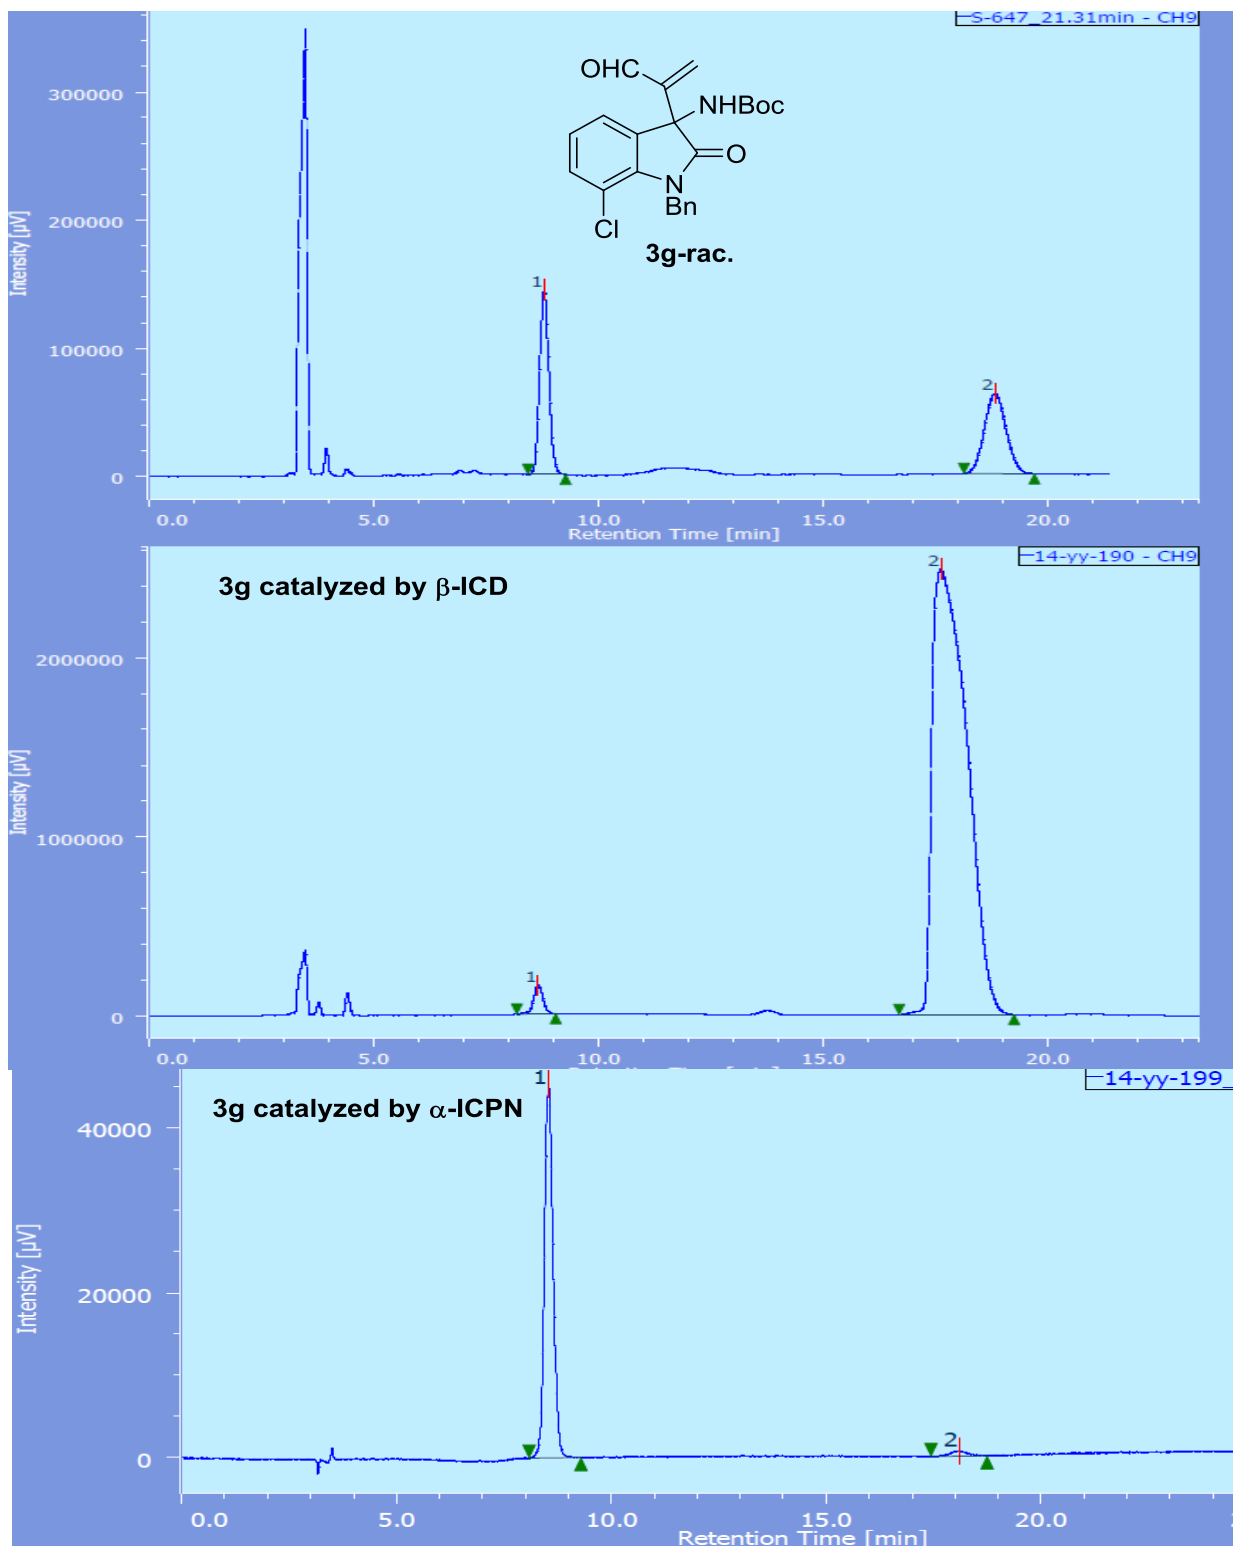

Channel & Peak Information Table

Chromatogram Name S-647\_21.31min-CH9

Sample Name

Channel Name 216.0nm

| # | Peak Name | CH | tR [min] | Area [ $\mu$ V·sec] | Height [ $\mu$ V] | Area%  | Height% | Quantity | NTP  | Resolution | Symmetry Factor | Warning |
|---|-----------|----|----------|---------------------|-------------------|--------|---------|----------|------|------------|-----------------|---------|
| 1 | Unknown   | 9  | 8.788    | 2068866             | 143692            | 49.749 | 69.710  | N/A      | 8554 | 15.821     | 1.073           |         |
| 2 | Unknown   | 9  | 18.807   | 2089717             | 62437             | 50.251 | 30.290  | N/A      | 7148 | N/A        | 1.071           |         |

| # | Peak Name | CH | tR [min] | Area [ $\mu$ V·sec] | Height [ $\mu$ V] | Area%  | Height% | Quantity | NTP  | Resolution | Symmetry Factor | Warning |
|---|-----------|----|----------|---------------------|-------------------|--------|---------|----------|------|------------|-----------------|---------|
| 1 | Unknown   | 9  | 8.657    | 2308681             | 159928            | 1.699  | 6.036   | N/A      | 8755 | 9.396      | 0.946           |         |
| 2 | Unknown   | 9  | 17.608   | 133554537           | 2489508           | 98.301 | 93.964  | N/A      | 2090 | N/A        | 2.165           |         |

| # | Peak Name | CH | tR [min] | Area [ $\mu$ V·sec] | Height [ $\mu$ V] | Area%  | Height% | Quantity | NTP  | Resolution | Symmetry Factor | Warning |
|---|-----------|----|----------|---------------------|-------------------|--------|---------|----------|------|------------|-----------------|---------|
| 1 | Unknown   | 9  | 8.528    | 640251              | 45244             | 97.008 | 98.652  | N/A      | 8592 | 15.509     | 1.144           |         |
| 2 | Unknown   | 9  | 18.083   | 19738               | 618               | 2.991  | 1.348   | N/A      | 6953 | N/A        | 0.996           |         |

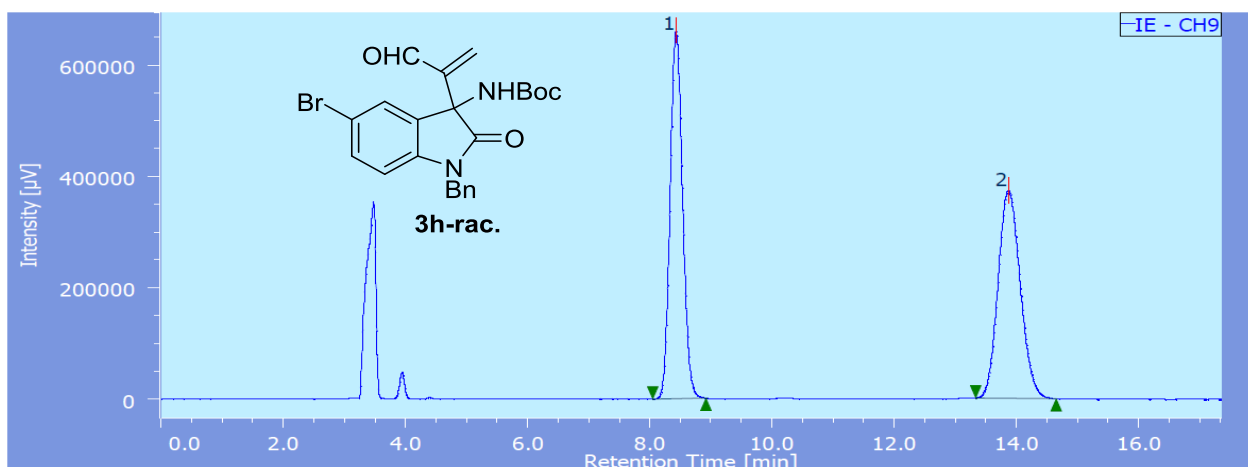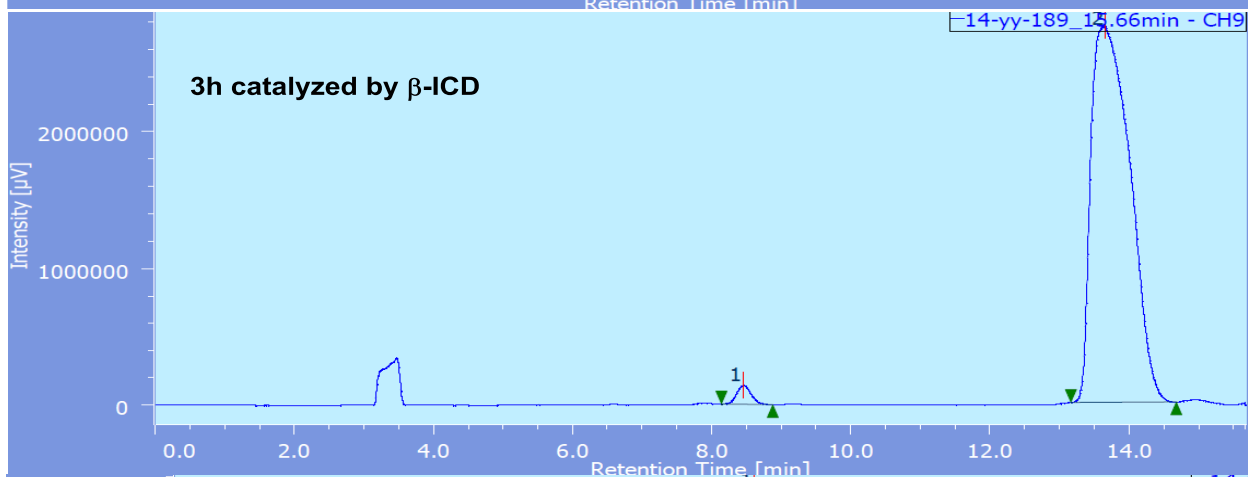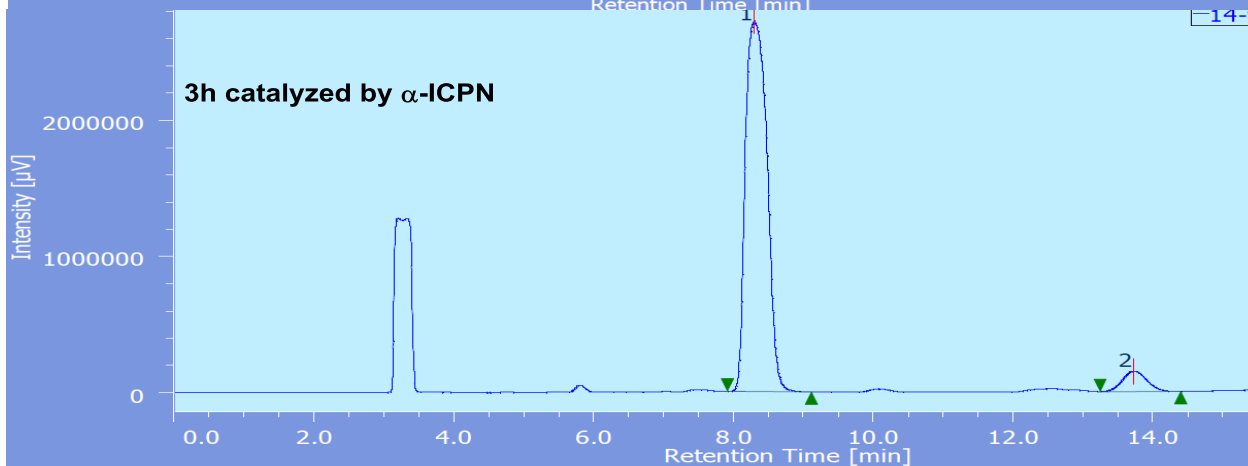

Channel & Peak Information Table

Chromatogram Name IE-CH9  
 Sample Name  
 Channel Name 216.0nm  
 Sampling Interval 100 [msec]  
 Peak Method (Manual)

Formula  
 Decision

| # | Peak Name | CH | tR [min] | Area [µV·sec] | Height [µV] | Area%  | Height% | Quantity | NTP  | Resolution | Symmetry Factor | Warning |
|---|-----------|----|----------|---------------|-------------|--------|---------|----------|------|------------|-----------------|---------|
| 1 | Unknown   | 9  | 8.427    | 9337402       | 659899      | 49.794 | 63.905  | N/A      | 8124 | 10.451     | 1.091           |         |
| 2 | Unknown   | 9  | 13.863   | 9414652       | 372727      | 50.206 | 36.095  | N/A      | 6865 | N/A        | 1.119           |         |
| # | Peak Name | CH | tR [min] | Area [µV·sec] | Height [µV] | Area%  | Height% | Quantity | NTP  | Resolution | Symmetry Factor | Warning |
| 1 | Unknown   | 9  | 8.453    | 1995395       | 137903      | 1.836  | 4.778   | N/A      | 7776 | 6.908      | 1.076           |         |
| 2 | Unknown   | 9  | 13.648   | 106688405     | 2748102     | 98.164 | 95.222  | N/A      | 2357 | N/A        | 1.587           |         |
| # | Peak Name | CH | tR [min] | Area [µV·sec] | Height [µV] | Area%  | Height% | Quantity | NTP  | Resolution | Symmetry Factor | Warning |
| 1 | Unknown   | 9  | 8.292    | 58229023      | 2719780     | 94.114 | 94.763  | N/A      | 2944 | 8.647      | 1.292           |         |
| 2 | Unknown   | 9  | 13.723   | 3641449       | 150319      | 5.886  | 5.237   | N/A      | 7166 | N/A        | 1.087           |         |



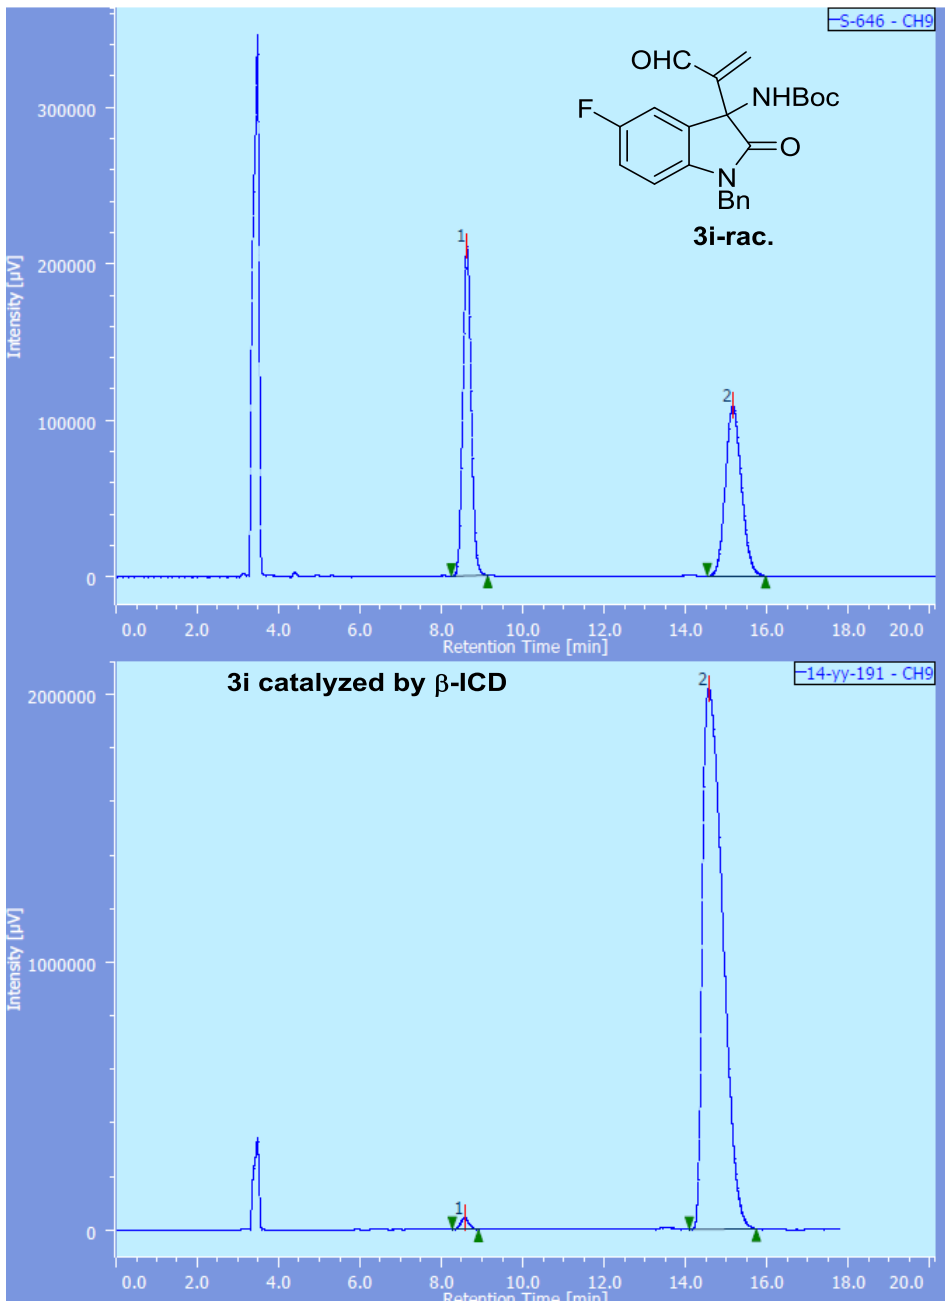

Channel & Peak Information Table

Chromatogram Name S-646-CH9

Sample Name

Channel Name 216.0nm

| # | Peak Name | CH | tR [min] | Area [ $\mu$ V $\cdot$ sec] | Height [ $\mu$ V] | Area%  | Height% | Quantity | NTP  | Resolution | Symmetry Factor | Warning |
|---|-----------|----|----------|-----------------------------|-------------------|--------|---------|----------|------|------------|-----------------|---------|
| 1 | Unknown   | 9  | 8.620    | 3008063                     | 210652            | 50.125 | 65.906  | N/A      | 8387 | 11.866     | 1.086           |         |
| 2 | Unknown   | 9  | 15.150   | 2993081                     | 108975            | 49.875 | 34.094  | N/A      | 6948 | N/A        | 1.128           |         |

  

| # | Peak Name | CH | tR [min] | Area [ $\mu$ V $\cdot$ sec] | Height [ $\mu$ V] | Area%  | Height% | Quantity | NTP  | Resolution | Symmetry Factor | Warning |
|---|-----------|----|----------|-----------------------------|-------------------|--------|---------|----------|------|------------|-----------------|---------|
| 1 | Unknown   | 9  | 8.563    | 590808                      | 42101             | 0.844  | 2.044   | N/A      | 8525 | 9.156      | 1.056           |         |
| 2 | Unknown   | 9  | 14.557   | 69370352                    | 2017750           | 99.156 | 97.956  | N/A      | 3824 | N/A        | 1.873           |         |

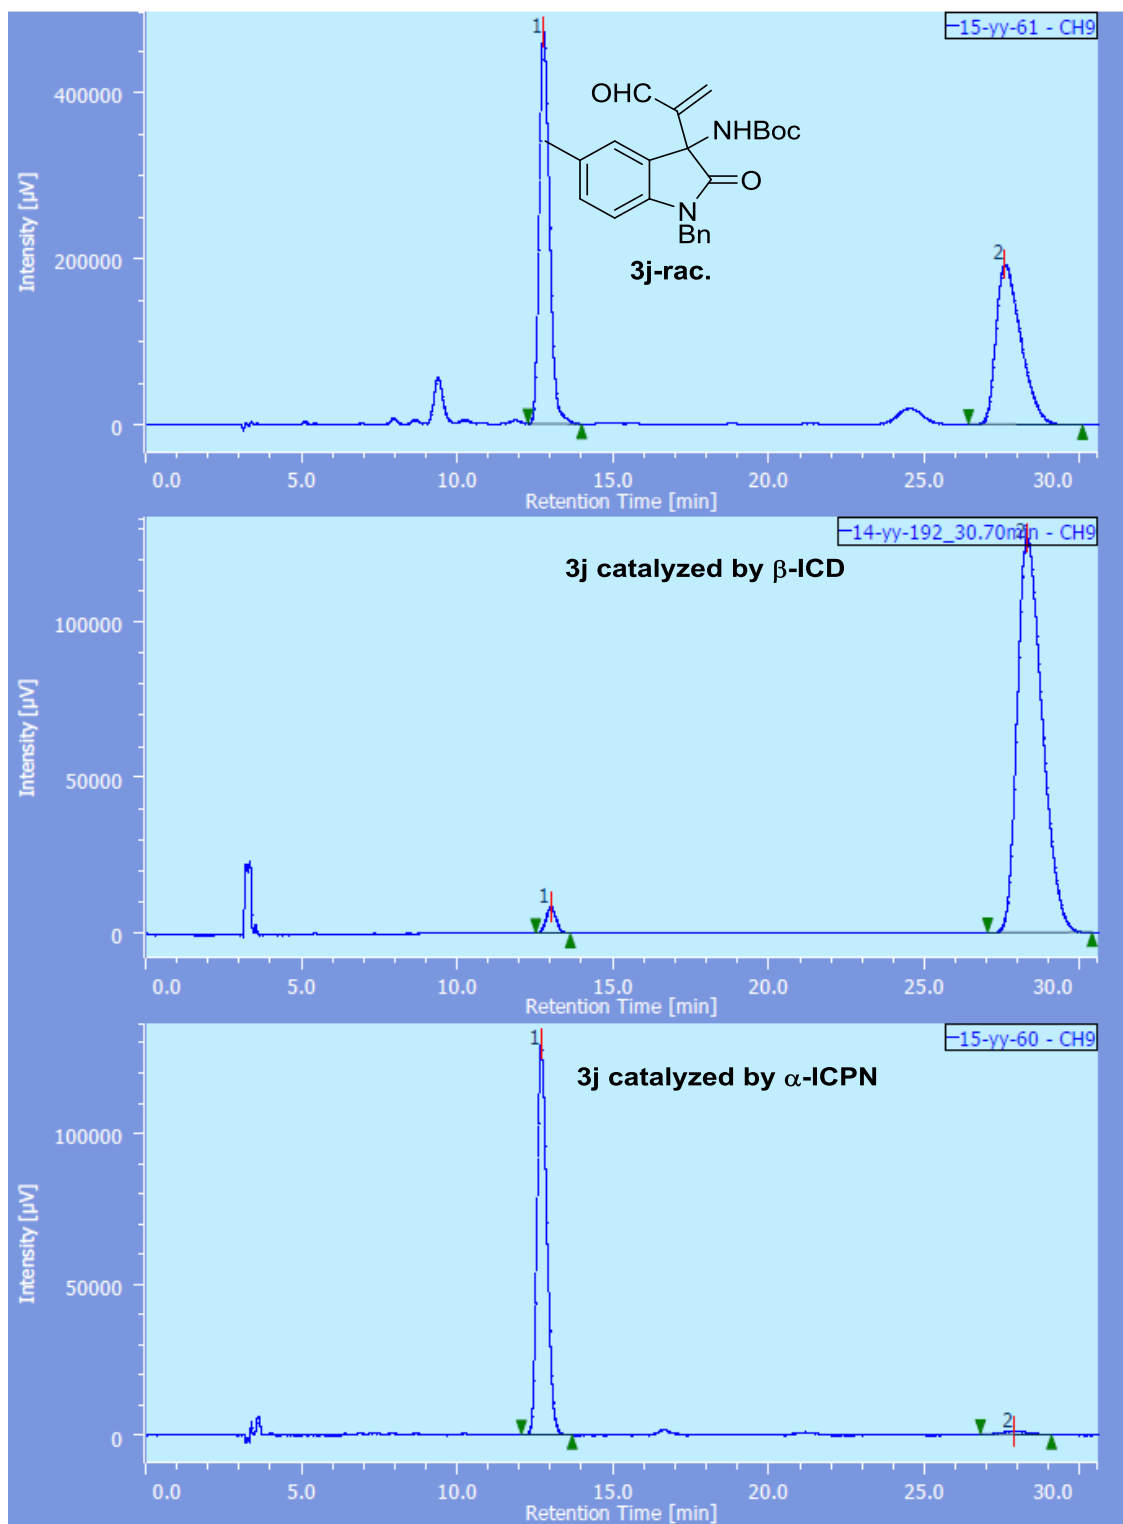

Channel & Peak Information Table

Chromatogram Name 15-yy-61-CH9

Sample Name

Channel Name 262.0nm

| # | Peak Name | CH | tR [min] | Area [ $\mu$ V $\cdot$ sec] | Height [ $\mu$ V] | Area%  | Height% | Quantity | NTP  | Resolution | Symmetry Factor | Warning |
|---|-----------|----|----------|-----------------------------|-------------------|--------|---------|----------|------|------------|-----------------|---------|
| 1 | Unknown   | 9  | 12.783   | 10811241                    | 470211            | 50.481 | 70.947  | N/A      | 7337 | 14.477     | 1.236           |         |
| 2 | Unknown   | 9  | 27.588   | 10605103                    | 192552            | 49.519 | 29.053  | N/A      | 5762 | N/A        | 1.531           |         |
| # | Peak Name | CH | tR [min] | Area [ $\mu$ V $\cdot$ sec] | Height [ $\mu$ V] | Area%  | Height% | Quantity | NTP  | Resolution | Symmetry Factor | Warning |
| 1 | Unknown   | 9  | 13.010   | 814668                      | 36084             | 2.656  | 6.406   | N/A      | 7402 | 14.558     | 1.044           |         |
| 2 | Unknown   | 9  | 28.297   | 29855422                    | 527168            | 97.344 | 93.594  | N/A      | 5688 | N/A        | 1.368           |         |
| # | Peak Name | CH | tR [min] | Area [ $\mu$ V $\cdot$ sec] | Height [ $\mu$ V] | Area%  | Height% | Quantity | NTP  | Resolution | Symmetry Factor | Warning |
| 1 | Unknown   | 9  | 12.705   | 2851721                     | 129506            | 97.766 | 99.109  | N/A      | 7680 | 14.680     | 1.224           |         |
| 2 | Unknown   | 9  | 27.900   | 65176                       | 1164              | 2.234  | 0.891   | N/A      | 5566 | N/A        | 1.197           |         |

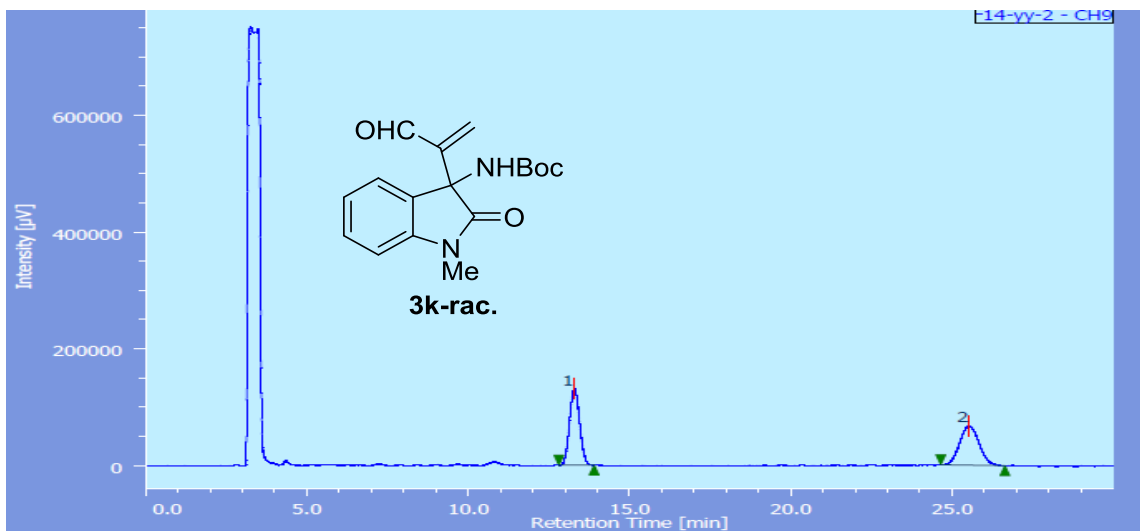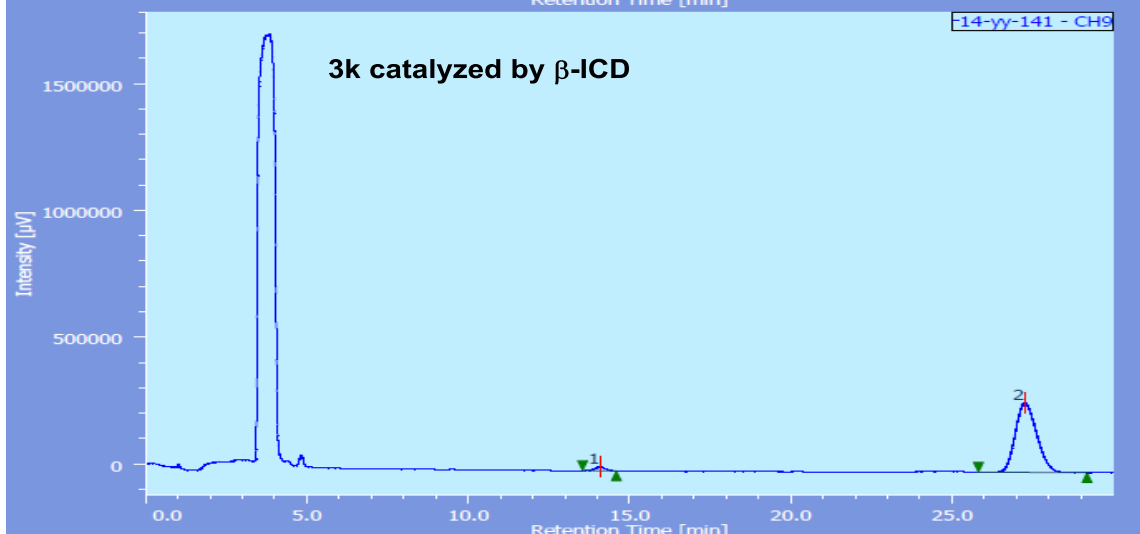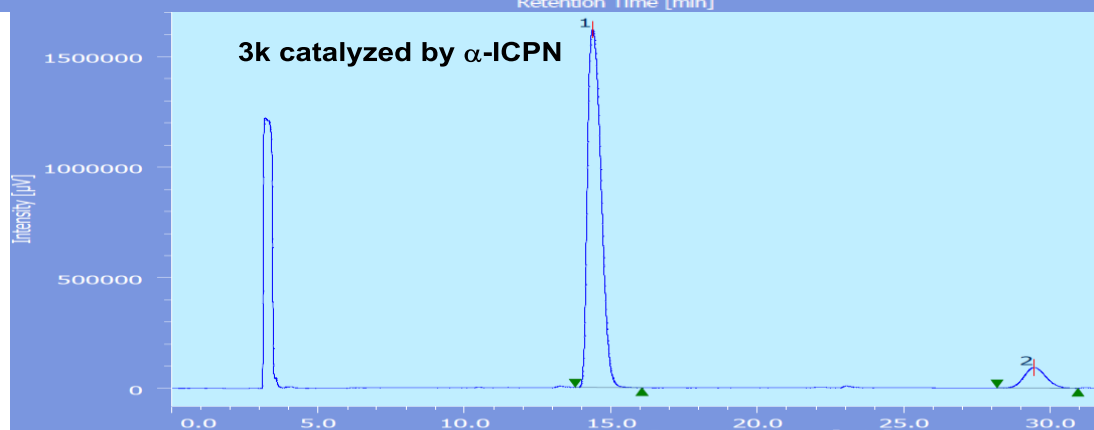

Channel & Peak Information Table

Chromatogram Name 14-yy-2-CH9

Sample Name

Channel Name 216.0nm

| # | Peak Name | CH | tR [min] | Area [µV·sec] | Height [µV] | Area%  | Height% | Quantity | NTP  | Resolution | Symmetry Factor | Warning |
|---|-----------|----|----------|---------------|-------------|--------|---------|----------|------|------------|-----------------|---------|
| 1 | Unknown   | 9  | 13.318   | 2260001       | 103073      | 50.217 | 66.049  | N/A      | 8528 | 14.441     | 1.095           |         |
| 2 | Unknown   | 9  | 25.610   | 2240490       | 52982       | 49.783 | 33.951  | N/A      | 8220 | N/A        | 1.066           |         |

| # | Peak Name | CH | tR [min] | Area [µV·sec] | Height [µV] | Area%  | Height% | Quantity | NTP  | Resolution | Symmetry Factor | Warning |
|---|-----------|----|----------|---------------|-------------|--------|---------|----------|------|------------|-----------------|---------|
| 1 | Unknown   | 9  | 14.078   | 359915        | 15274       | 2.748  | 5.278   | N/A      | 8201 | 14.237     | 1.004           |         |
| 2 | Unknown   | 9  | 27.240   | 12738927      | 274099      | 97.252 | 94.722  | N/A      | 7821 | N/A        | 1.187           |         |

| # | Peak Name | CH | tR [min] | Area [µV·sec] | Height [µV] | Area%  | Height% | Quantity | NTP  | Resolution | Symmetry Factor | Warning |
|---|-----------|----|----------|---------------|-------------|--------|---------|----------|------|------------|-----------------|---------|
| 1 | Unknown   | 9  | 14.373   | 51912065      | 1617280     | 91.408 | 94.560  | N/A      | 4262 | 13.331     | 1.462           |         |
| 2 | Unknown   | 9  | 29.442   | 4879330       | 93050       | 8.592  | 5.440   | N/A      | 7220 | N/A        | 1.105           |         |

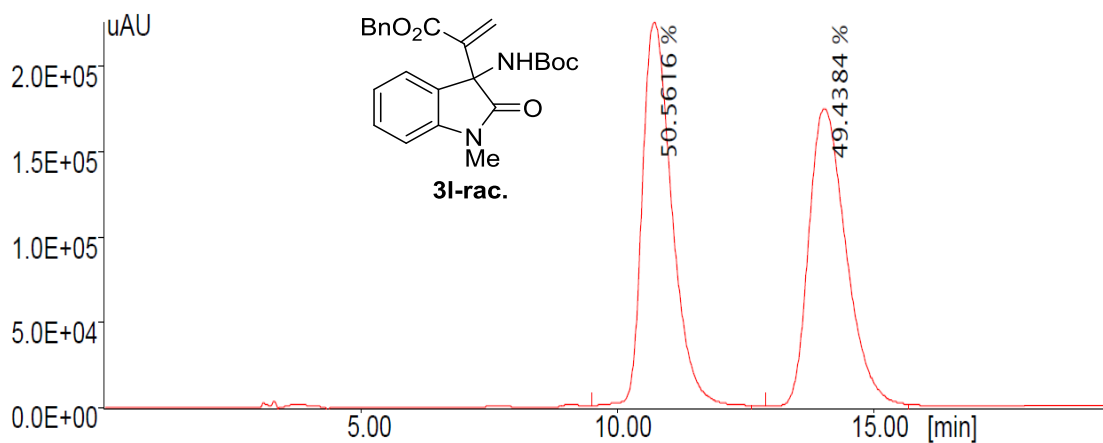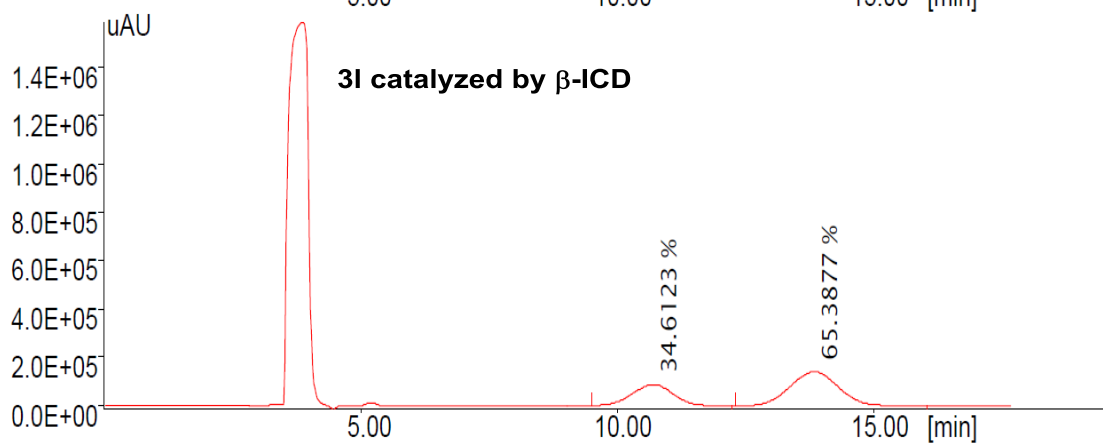

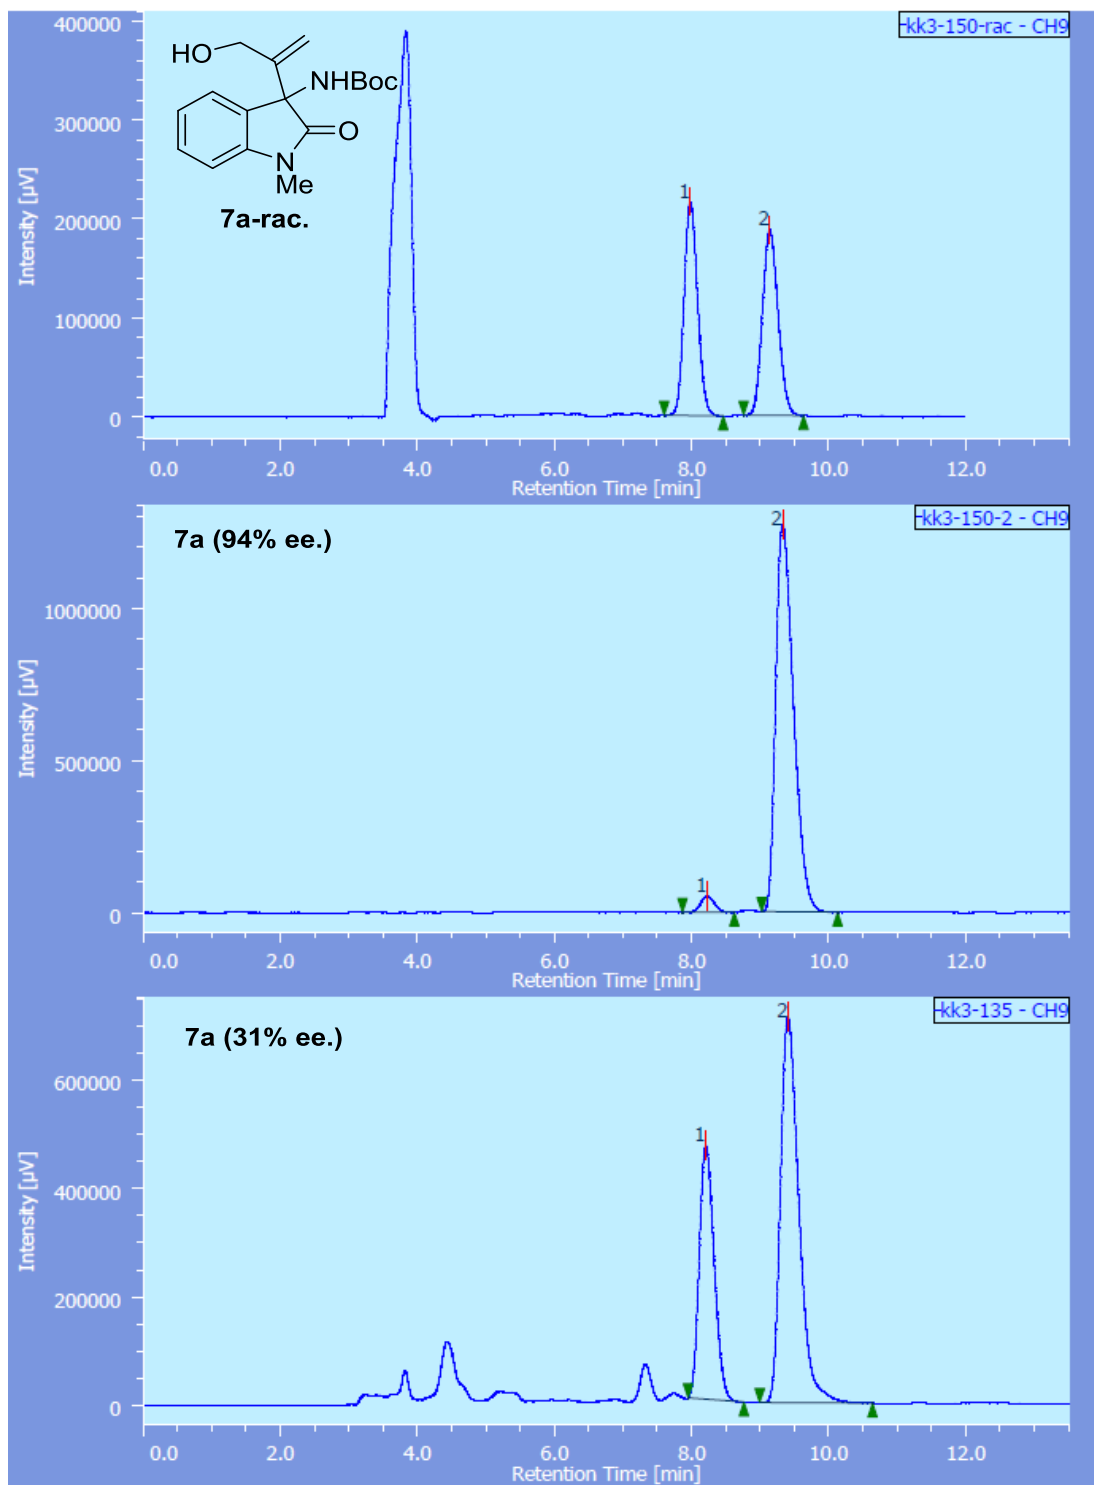

Channel & Peak Information Table

Chromatogram Name kk3-150-rac-CH9

Sample Name kk3-150-rac

Channel Name 240.0nm

| # | Peak Name | CH | tR [min] | Area [μV·sec] | Height [μV] | Area%  | Height% | Quantity | NTP  | Resolution | Symmetry Factor | Warning |
|---|-----------|----|----------|---------------|-------------|--------|---------|----------|------|------------|-----------------|---------|
| 1 | Unknown   | 9  | 7.980    | 2959143       | 216311      | 49.861 | 53.576  | N/A      | 7845 | 2.976      | 1.126           |         |
| 2 | Unknown   | 9  | 9.138    | 2975637       | 187432      | 50.139 | 46.424  | N/A      | 7568 | N/A        | 1.130           |         |
| # | Peak Name | CH | tR [min] | Area [μV·sec] | Height [μV] | Area%  | Height% | Quantity | NTP  | Resolution | Symmetry Factor | Warning |
| 1 | Unknown   | 9  | 8.225    | 753173        | 53731       | 3.186  | 4.051   | N/A      | 7722 | 2.596      | 1.077           |         |
| 2 | Unknown   | 9  | 9.325    | 22884591      | 1272600     | 96.814 | 95.949  | N/A      | 6158 | N/A        | 1.458           |         |
| # | Peak Name | CH | tR [min] | Area [μV·sec] | Height [μV] | Area%  | Height% | Quantity | NTP  | Resolution | Symmetry Factor | Warning |
| 1 | Unknown   | 9  | 8.207    | 7053465       | 467825      | 34.636 | 39.645  | N/A      | 6670 | 2.729      | 1.215           |         |
| 2 | Unknown   | 9  | 9.405    | 13311203      | 712218      | 65.364 | 60.355  | N/A      | 6180 | N/A        | 1.402           |         |

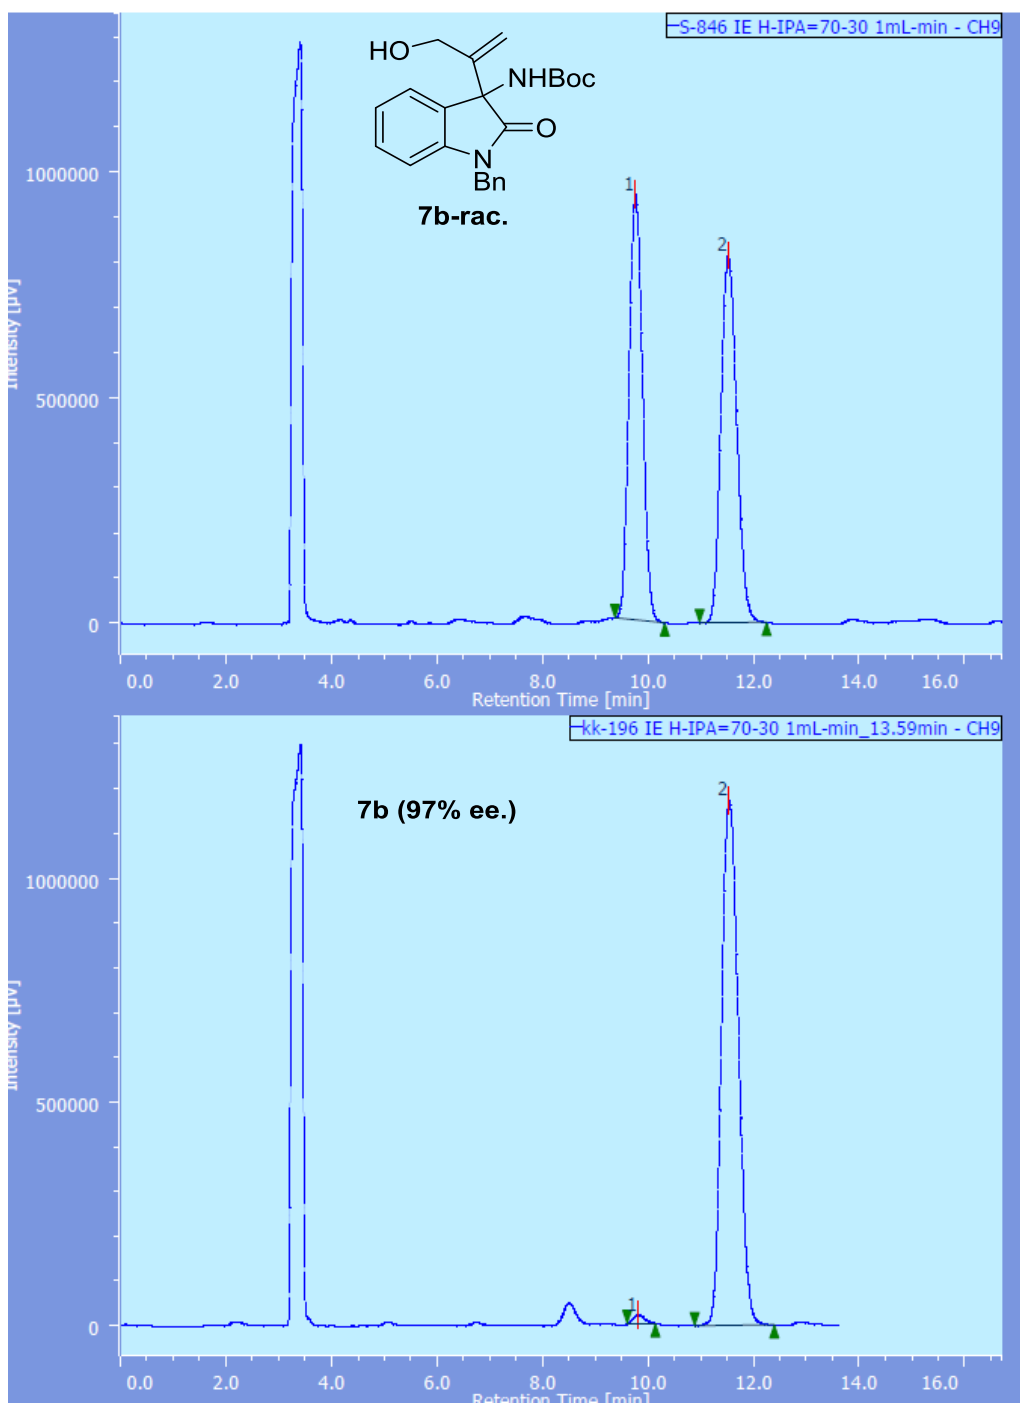

| # | Peak Name | CH | tR [min] | Area [µV-sec] | Height [µV] | Area%  | Height% | Quantity | NTP  | Resolution | Symmetry Factor | Warning |
|---|-----------|----|----------|---------------|-------------|--------|---------|----------|------|------------|-----------------|---------|
| 1 | Unknown   | 9  | 9.758    | 16756510      | 943503      | 49.708 | 53.695  | N/A      | 6652 | 3.401      | 1.087           |         |
| 2 | Unknown   | 9  | 11.512   | 16953113      | 813656      | 50.292 | 46.305  | N/A      | 6880 | N/A        | 1.154           |         |

Chromatogram Name kk-196 IE H-IPA=70-30 1mL-min\_13.59min-CH9

Sample Name

Channel Name 214.0nm

| # | Peak Name | CH | tR [min] | Area [µV-sec] | Height [µV] | Area%  | Height% | Quantity | NTP  | Resolution | Symmetry Factor | Warning |
|---|-----------|----|----------|---------------|-------------|--------|---------|----------|------|------------|-----------------|---------|
| 1 | Unknown   | 9  | 9.810    | 320605        | 19943       | 1.219  | 1.671   | N/A      | 8002 | 3.333      | 1.244           |         |
| 2 | Unknown   | 9  | 11.528   | 25987902      | 1173906     | 98.781 | 98.329  | N/A      | 6001 | N/A        | 1.184           |         |

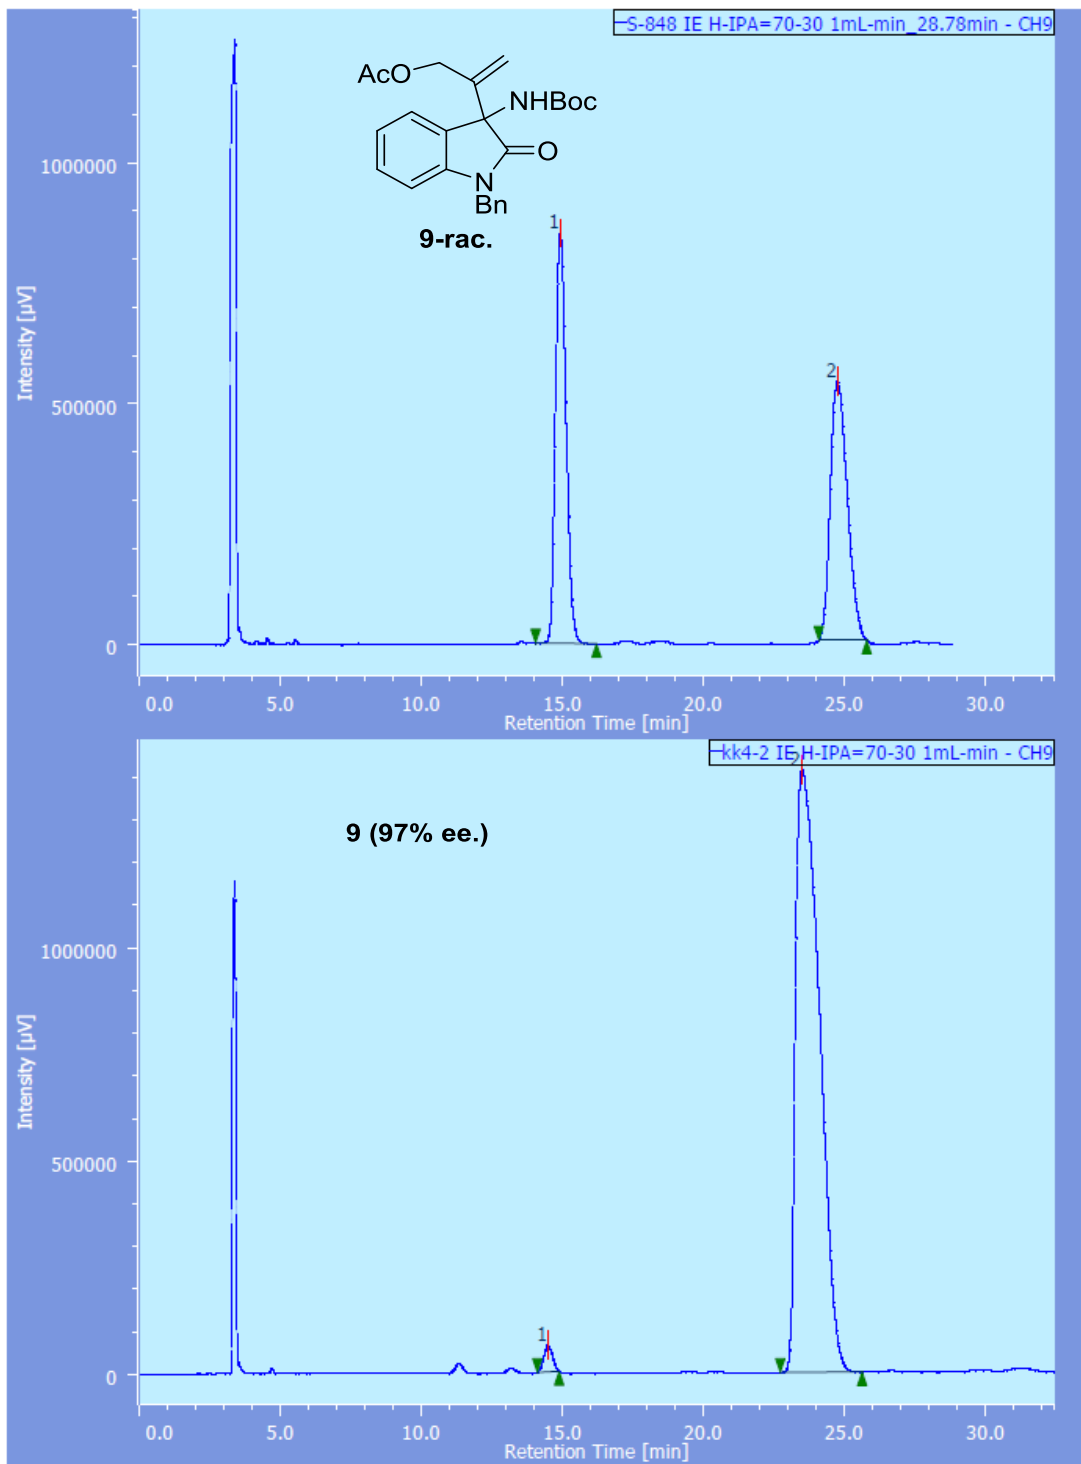

| # | Peak Name | CH | tR [min] | Area [μV·sec] | Height [μV] | Area%  | Height% | Quantity | NTP  | Resolution | Symmetry Factor | Warning |
|---|-----------|----|----------|---------------|-------------|--------|---------|----------|------|------------|-----------------|---------|
| 1 | Unknown   | 9  | 14.930   | 22374162      | 850134      | 49.685 | 61.305  | N/A      | 7284 | 10.736     | 1.207           |         |
| 2 | Unknown   | 9  | 24.760   | 22658295      | 536584      | 50.315 | 38.695  | N/A      | 7596 | N/A        | 1.264           |         |

Chromatogram Name kk4-2 IE H-IPA=70-30 1mL-min-CH9

Sample Name

Channel Name 210.0nm

| # | Peak Name | CH | tR [min] | Area [μV·sec] | Height [μV] | Area%  | Height% | Quantity | NTP  | Resolution | Symmetry Factor | Warning |
|---|-----------|----|----------|---------------|-------------|--------|---------|----------|------|------------|-----------------|---------|
| 1 | Unknown   | 9  | 14.497   | 1381919       | 62360       | 1.638  | 4.229   | N/A      | 9143 | 7.999      | 1.040           |         |
| 2 | Unknown   | 9  | 23.497   | 82959729      | 1412225     | 98.362 | 95.771  | N/A      | 3245 | N/A        | 2.047           |         |

## References

1. F.-L. Hu, Y. Wei, M. Shi, S. Pindi and G. Li, *Org. Biomol. Chem.*, 2013, **11**, 1921.
2. X. Zhao, T.-Z. Li, J.-Y. Qian, F. Sha and X.-Y. Wu, *Org. Biomol. Chem.*, 2014, **12**, 8072.
